# Supplementary material for: The Enigmatic Origin of Papillomavirus Protein Domains
Source: MDPI journal article supplement (doi:10.3390/v9090240), 2017-08-23
Supplement: s1 [file s1]

# Supplementary

**Table S1.** PV\_PfamA domain occurrence in biosphere.

|         |                 | <i>Papillomaviridae</i> <sup>1,5</sup> | PDB PfamA_28 <sup>2</sup> | PfamA domain length <sup>3</sup> | PDB PfamA_31 <sup>2</sup> | Best coverage of PfamA by PDB (% aa) | Eukaryota (proteomes) <sup>1</sup> | Bacteria (proteomes) <sup>1</sup> | Archaea (proteomes) <sup>1,4</sup> | VIRUSES (proteomes) <sup>1,4</sup> | Eukaryota (full UP) <sup>1</sup> | Bacteria (full UP) <sup>1</sup> | Archaea (full UP) | VIRUSES (full UP) <sup>4</sup> | HMMER E | HMMER B | HMMER A | HMMER V  |
|---------|-----------------|----------------------------------------|---------------------------|----------------------------------|---------------------------|--------------------------------------|------------------------------------|-----------------------------------|------------------------------------|------------------------------------|----------------------------------|---------------------------------|-------------------|--------------------------------|---------|---------|---------|----------|
| PF00500 | Late_protein_L1 | 76                                     | 10                        | 498                              | 18                        | 0.96                                 | 0                                  | 0                                 | 0                                  | 0                                  | 1/0                              | 0                               | 0                 | 0                              | 9/0     | 2/0     | 0       | 0        |
| PF00508 | PPV_E2_N        | 76                                     | 8                         | 200                              | 8                         | 0.98                                 | 0                                  | 0                                 | 0                                  | 0                                  | 0                                | 0                               | 0                 | 0                              | 7/0     | 24/0    | 0       | 0        |
| PF00511 | PPV_E2_C        | 76                                     | 16                        | 80                               | 16                        | 0.96                                 | 0                                  | 0                                 | 0                                  | 0                                  | 0                                | 0                               | 0                 | 0                              | 9/0     | 2/0     | 0       | 0        |
| PF00513 | Late_protein_L2 | 76                                     | 0                         | 525                              | 0                         |                                      | 0                                  | 0                                 | 0                                  | 0                                  | 1/0                              | 0                               | 0                 | 0                              | 8/0     | 1/0     | 0       | 0        |
| PF00518 | E6              | 71                                     | 7                         | 110                              | 8                         | 0.99                                 | 1/0                                | 1/0                               | 0                                  | 0                                  | 2/0                              | 1/0                             | 0                 | 0                              | 7/0     | 1/0     | 0       | 0        |
| PF00519 | PPV_E1_C        | 74                                     | 7                         | 432                              | 8                         | 0.96                                 | 6/0                                | 2/1                               | 0                                  | 0                                  | 19/0                             | 28/21                           | 0                 | 242/ND/1                       | 35/0    | 2/1     | 0       | 822/ND/1 |
| PF00524 | PPV_E1_N        | 72                                     | 0                         | 121                              | 0                         |                                      | 2/2                                | 0                                 | 0                                  | 0                                  | 4/4                              | 0                               | 0                 | 0                              | 5/0     | 3/0     | 0       | 0        |
| PF00527 | E7              | 71                                     | 3                         | 93                               | 4                         | 0.50                                 | 0                                  | 0                                 | 0                                  | 0                                  | 1/0                              | 1/0                             | 0                 | 0                              | 4/0     | 2/0     | 0       | 0        |
| PF02711 | Pap_E4          | 25                                     | 0                         | 95                               | 0                         |                                      | 0                                  | 0                                 | 0                                  | 0                                  | 0                                | 0                               | 0                 | 0                              | 0       | 1/0     | 0       | 0        |
| PF03025 | Papilloma_E5    | 9                                      | 0                         | 72                               | 0                         |                                      | 0                                  | 0                                 | 0                                  | 0                                  | 1/0                              | 0                               | 0                 | 0                              | 1/0     | 1/0     | 0       | 0        |
| PF05776 | Papilloma_E5A   | 5                                      | 0                         | 91                               | 0                         |                                      | 0                                  | 0                                 | 0                                  | 0                                  | 0                                | 0                               | 0                 | 0                              | 0       | 1/0     | 0       | 0        |
| PF08135 | EPV_E5          | 3                                      | 0                         | 43                               | 0                         |                                      | 0                                  | 0                                 | 0                                  | 0                                  | 0                                | 0                               | 0                 | 0                              | 0       | 0       | 0       | 0        |

<sup>1</sup> Number of distinct proteomes/species in database with given taxonomic restrictions coding respective domain. <sup>2</sup> Number of PDB entries for respective PfamA domain. <sup>3</sup> Model length. <sup>4</sup> Excluding papillomaviruses.

<sup>5</sup> 76 PV proteomes in this database. \* Number before the slash shows all hits (distinct proteomes / species).

Number after the first slash shows hits after removal of false positives as described in Materials and Methods.

For viruses, after the second slash are the true positive hits without *Polyomaviridae* and *Parvoviridae*. "Bold"

Number of true positive hits described in detail in Supplementary Materials, File S1.

**Table S2.** HMM model version used as query profiles in ‘hmmsearch’

## a) PfamA models

|         | <b>PfamA domain</b> | <b>HMM version number</b> |
|---------|---------------------|---------------------------|
| PF00500 | Late_protein_L1     | PF00500.17                |
| PF00508 | PPV_E2_N            | PF00508.16                |
| PF00511 | PPV_E2_C            | PF00511.16                |
| PF00513 | Late_protein_L2     | PF00513.17                |
| PF00518 | E6                  | PF00518.16                |
| PF00519 | PPV_E1_C            | PF00519.16                |
| PF00524 | PPV_E1_N            | PF00524.17                |
| PF00527 | E7                  | PF00527.17                |
| PF02711 | Pap_E4              | PF02711.13                |
| PF03025 | Papilloma_E5        | PF03025.13                |
| PF05776 | Papilloma_E5A       | PF05776.11                |
| PF08135 | EPV_E5              | PF08135.10                |

## b) SUPERFAMILY models

| SF    | HMM model ID | No. of sequences | Model Build date | Seed sequence (SCOP domain name) | SCOP family of seed                             | Viral family of seed sequence |
|-------|--------------|------------------|------------------|----------------------------------|-------------------------------------------------|-------------------------------|
| 55464 | 0052766      | 293              | 2008-09-10       | d2fufa1                          | The origin DNA-binding domain of SV40 T-antigen | <i>Polyomaviridae</i>         |
| 55464 | 0043184      | 110              | 2005-09-08       | d1r9wa_                          | Replication initiation protein E1               | <i>Papillomaviridae</i>       |
| 55464 | 0037306      | 110              | 2005-09-08       | d1f08a_                          | Replication initiation protein E1               | <i>Papillomaviridae</i>       |
| 55464 | 0040790      | 22               | 2005-09-08       | d1m55a_                          | Replication protein Rep, nuclease domain        | <i>Parvoviridae</i>           |
| 55464 | 0040363      | 209              | 2005-09-08       | d1l2ma_                          | DNA-binding domain of REP protein               | <i>Geminiviridae</i>          |
| 55464 | 0042148      | 63               | 2005-09-08       | d1p4da_                          | Relaxase domain                                 |                               |
| 55464 | 0041922      | 64               | 2005-09-08       | d1omha_                          | Relaxase domain                                 |                               |
| 51332 | 0044126      | 120              | 2005-09-08       | d1tueb_                          | E2 regulatory, transactivation domain           | <i>Papillomaviridae</i>       |
| 51332 | 0036595      | 120              | 2005-09-08       | d1dtoa_                          | E2 regulatory, transactivation domain           | <i>Papillomaviridae</i>       |
| 51332 | 0043150      | 120              | 2005-09-08       | d1r6na_                          | E2 regulatory, transactivation domain           | <i>Papillomaviridae</i>       |
| 51332 | 0042936      | 119              | 2005-09-08       | d1qqha_                          | E2 regulatory, transactivation domain           | <i>Papillomaviridae</i>       |

|        |         |      |            |         |                           |                              |
|--------|---------|------|------------|---------|---------------------------|------------------------------|
| 54957  | 0045729 | 253  | 2008-09-10 | d1a7ge_ | Viral DNA-binding domain  | <i>Papillomaviridae</i>      |
| 54957  | 0046292 | 253  | 2008-09-10 | d1bdba_ | Viral DNA-binding domain  | <i>Papillomaviridae</i>      |
| 54957  | 0049130 | 253  | 2008-09-10 | d1r8ha_ | Viral DNA-binding domain  | <i>Papillomaviridae</i>      |
| 54957  | 0035341 | 8    | 2005-09-08 | d1b3ta_ | Viral DNA-binding domain  | <b><i>Herpesviridae</i></b>  |
| 54957  | 0046040 | 251  | 2008-09-10 | d1by9a_ | Viral DNA-binding domain  | <i>Papillomaviridae</i>      |
| 54957  | 0046732 | 253  | 2008-09-10 | d1f9fa_ | Viral DNA-binding domain  | <i>Papillomaviridae</i>      |
| 88648  | 0043624 | 14   | 2005-09-08 | d1sida_ | Papovaviridae-like VP     | <b><i>Polyomaviridae</i></b> |
| 88648  | 0046429 | 1104 | 2008-09-10 | d1dzla_ | Papovaviridae-like VP     | <i>Papillomaviridae</i>      |
| 88648  | 0043775 | 13   | 2005-09-08 | d1sva1_ | Papovaviridae-like VP     | <b><i>Polyomaviridae</i></b> |
| 161229 | 0053919 | 315  | 2010-05-31 | d2fk4a1 | E6 C-terminal domain-like | <i>Papillomaviridae</i>      |
| 161234 | 0053733 | 163  | 2010-05-31 | d2b9da1 | E7 C-terminal domain-like | <i>Papillomaviridae</i>      |
| 161234 | 0053897 | 160  | 2010-05-31 | d2ewla1 | E7 C-terminal domain-like | <i>Papillomaviridae</i>      |

**Table S3.** PV\_SF domain occurrence in biosphere

| SCOP/SF ID        | Classification | SF/FOLD | Families/SF | Description                                                        | PV          | Viruses <sup>1,3</sup> | Plasmids <sup>2,3</sup> | Archaea <sup>3</sup> | Bacteria <sup>3</sup> | Eukaryota <sup>3</sup> | HMMER A | HMMER B     | HMMER E   | HMMER V <sup>1</sup> |
|-------------------|----------------|---------|-------------|--------------------------------------------------------------------|-------------|------------------------|-------------------------|----------------------|-----------------------|------------------------|---------|-------------|-----------|----------------------|
| 55464             | d.89.1         | 1       | 5           | Origin of replication-binding domain, RBD-like (E1 DBD)            | 123/<br>123 | 424/<br>ND/15          | 420/<br>ND              | 0                    | 134/<br>ND            | 8/8                    | 0       | 4038/<br>ND | 52/<br>32 | 1563/<br>ND/169      |
| 52540             | c.37.1         | 1       | 24          | P-loop containing nucleoside triphosphate hydrolases (E1 helicase) | 122/<br>123 | 2346/ND                | 19971/<br>ND            | 122/<br>ND           | 1153/<br>ND           | 440/<br>ND             | ND      | ND          | ND        | ND                   |
| 51332             | b.91.1         | 1       | 1           | E2 regulatory, transactivation domain (E2 TAD)                     | 122/<br>123 | 0                      | 0                       | 0                    | 0                     | 0                      | 0       | 25/0        | 7/0       | 0                    |
| 54957             | d.58.8         | 59      | 1           | Viral DNA-binding domain (E2 DBD)                                  | 121/<br>123 | 4/4                    | 0                       | 0                    | 0                     | 0                      | 0       | 1/0         | 10/0      | 6/6                  |
| 88648             | b.121.6        | 7       | 1           | Group I dsDNA viruses (L1)                                         | 125/<br>123 | 50/50/0                | 0                       | 0                    | 0                     | 0                      | 0       | 2/0         | 7/0       | 170/<br>ND/0         |
| 161229            | g.90.1         | 1       | 1           | E6 C-terminal domain-like                                          | 115/<br>115 | 0                      | 0                       | 1/0                  | 7/0                   | 0                      | 0       | 1/1         | 9/0       | 0                    |
| 161234            | g.91.1         | 1       | 1           | E7 C-terminal domain-like                                          | 108/<br>108 | 0                      | 0                       | 0                    | 2/0                   | 0                      | 0       | 2/0         | 4/0       | 0                    |
| SF_55464:SF_52540 |                |         |             | DBD + helicase                                                     | 122/<br>123 | 106/ND/7               | 356                     | 0                    | 119                   | 5                      | 0       | ND          | 10        |                      |

Number before the slash shows primary hits (number of genomes the SF is found). Number after the first slash shows true positives, after the second slash (in nonPV viral columns) number of true positives without *Polyomaviridae*, *Parvoviridae* and *Geminiviridae*.

<sup>1</sup> Excluding papillomaviruses. <sup>2</sup> Number of proteins. <sup>3</sup> SUPERFAMILY data from locally downloaded database of non-redundant set of genomes (including Archaea 122 genomes, Bacteria 1153 genomes, Eukaryota 440 genomes; i.e. redundant strains and isolates removed). "ND" Not determined. "Bold" Number of true positive hits described in detail in Supplementary Materials, File S1.

In the current version of SUPERFAMILY the sequences with assigned SF\_55464 can be found in eukaryotes:

<http://supfam.org/SUPERFAMILY/cgi-bin/allcombs.cgi?genome=euk;comb=55464;subdomain=y>

in plasmids:

<http://supfam.org/SUPERFAMILY/cgi-bin/allcombs.cgi?genome=pla;comb=55464;subdomain=y>

and in viruses:

<http://supfam.org/SUPERFAMILY/cgi-bin/allcombs.cgi?genome=vl;comb=55464;subdomain=y>

\* You can change the '55464' in URL to other SF numbers for respective data.

Domain composition of specified Uniprot sequences can be evaluated in

<http://supfam.org/SUPERFAMILY/cgi-bin/gene.cgi?genome=up;seqid=U9TRZ4>

\* By changing Uniprot sequence names after last equation mark.

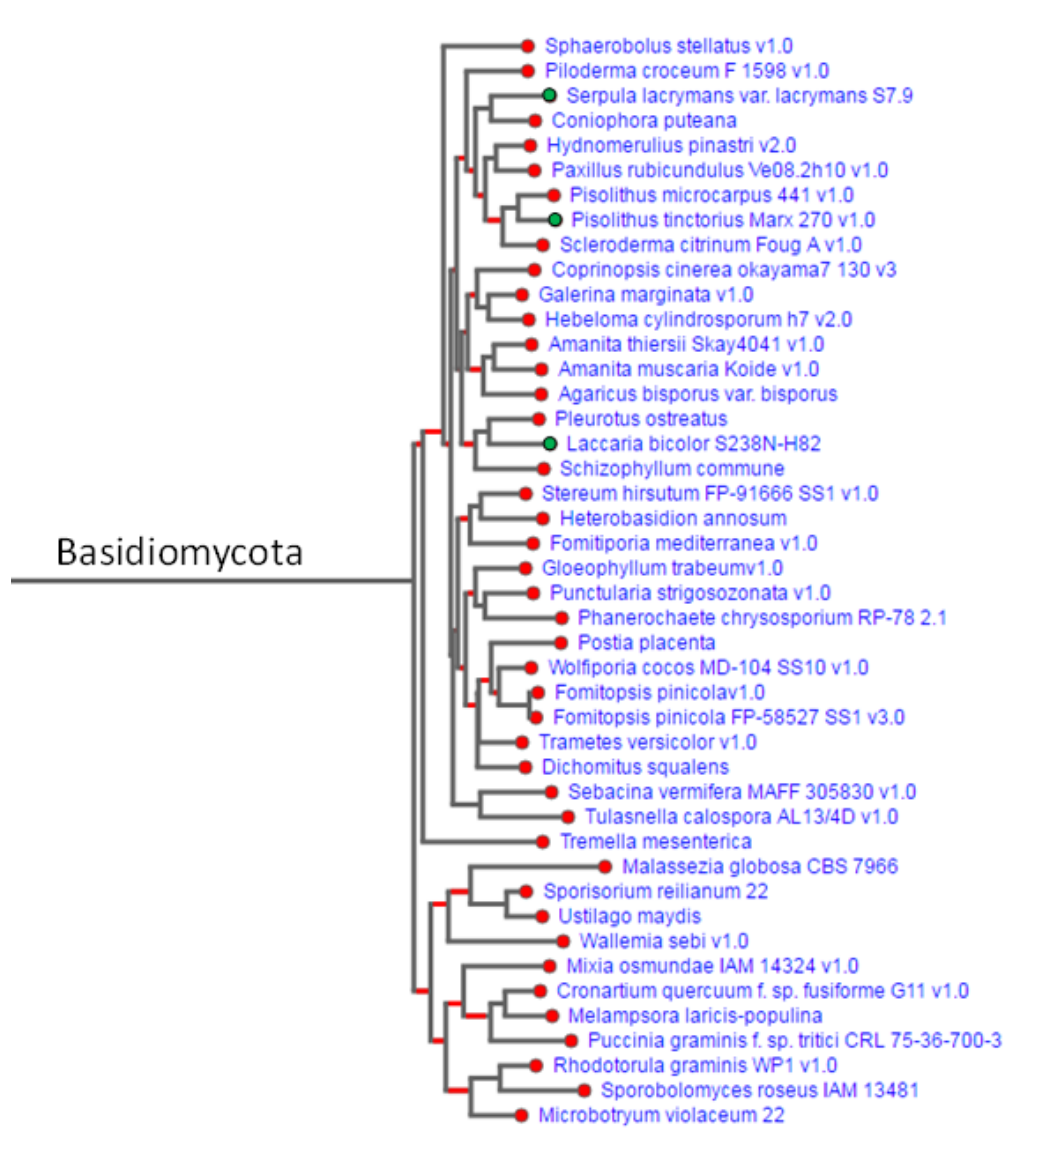

**Figure S1.** SF\_55464 is found in three Basidiomycota species (green circles). Species with red circle correspond to other Basidiomycota proteomes in SUPERFAMILY. Tree from SUPERFAMILY resource according to method [1].

1. Fang, H.; Oates, M. E.; Pethica, R. B.; Greenwood, J. M.; Sardar, A. J.; Rackham, O. J. L.; Donoghue, P. C. J.; Stamatakis, A.; de Lima Morais, D. A.; Gough, J. A daily-updated tree of (sequenced) life as a reference for genome research. *Sci. Rep.* 2013, 3, doi:10.1038/srep02015.

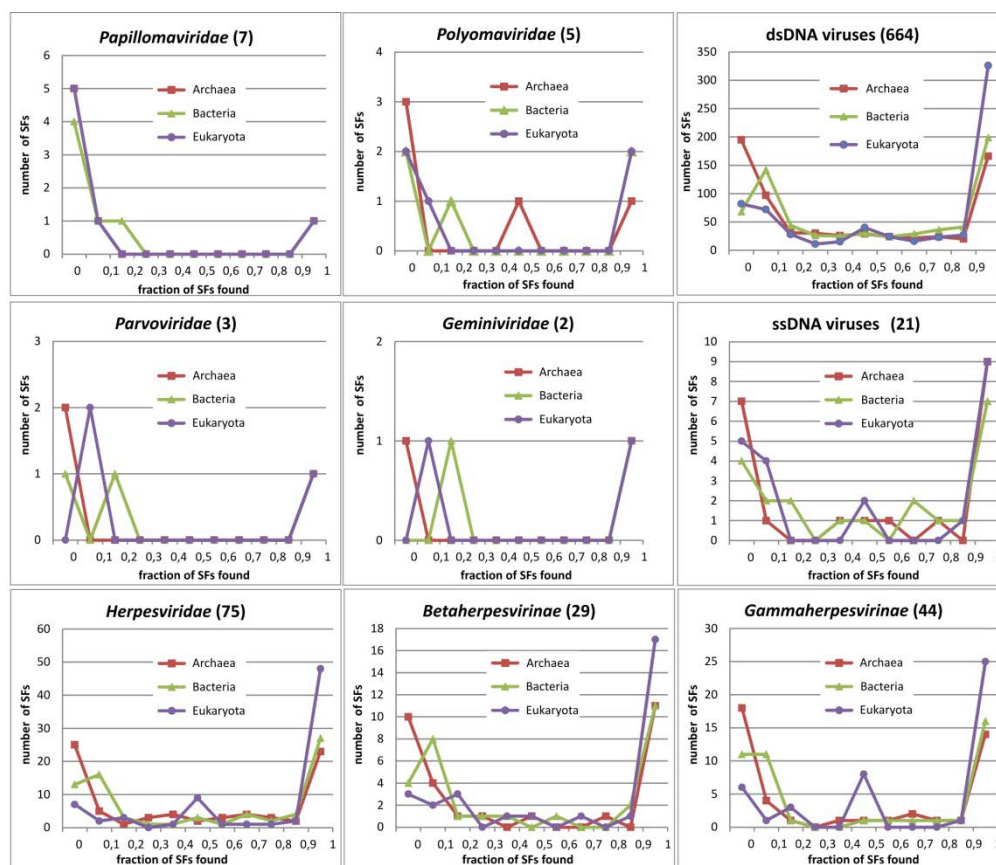

**Figure S2.** Distribution of protein domains in viral families by superkingdoms. Only data of the domains found in the viral family in the panel title are shown in each figure. The number in parentheses in the figure titles correspond to the number of distinct domains found in the respective viral family. On the x-axis, the decile of genomes by superkingdom where viral protein domains are found. The line shows the superkingdom for which the fraction is calculated. On the y-axis, the number of domains is given for those found in the taxon indicated in the title and the respective decile.

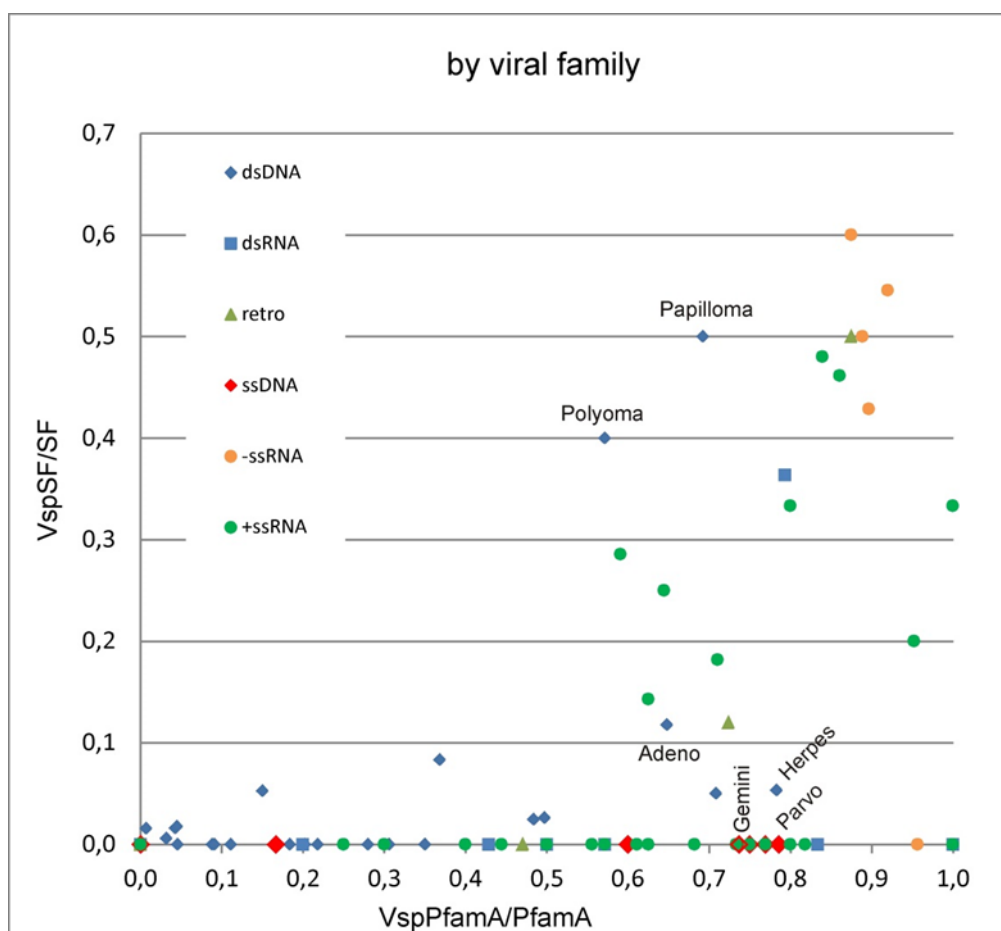

**Figure S3.** Ratio of virospere-specific domains to total number of domains in that viral taxon. For respective taxons, the total number of assigned domains was calculated, as well as the number of virospere-specific domains. The indicated ratios are shown on the axis. Every data-point corresponds to a viral family. Most of the viral family names have been omitted for clarity. For full names see citation [2] supplementary.

2. Abroi, A. A protein domain-based view of the virospere-host relationship. *Biochimie* 2015, *119*, 231–243, doi:10.1016/j.biochi.2015.08.008.

### Threading programs behind LOMETS metasever.

Description of LOMETS on April 18th, 2017 from <http://zhanglab.ccmb.med.umich.edu/LOMETS/> and <https://zhanglab.ccmb.med.umich.edu/LOMETS/readme.txt>.

LOMETS (Local Meta-Threading-Server) is an on-line web service for protein structure prediction [1]. It generates 3D models by collecting high-scoring target-to-template alignments from 9 locally-installed threading programs (FFAS-3D, HHsearch, MUSTER, pGenTHREADER, PPAS, PRC, PROSPECT2, SP3, and SPARKS-X).

| Server(i)       | Reference |
|-----------------|-----------|
| 1. cdPPAS       | [7]       |
| 2. FFAS03       | [8]       |
| 3. FFAS-3D      | [11]      |
| 4. MUSTER       | [2]       |
| 5. HHSEARCH     | [3]       |
| 6. HHSEARCH-I   | [3]       |
| 7. HHSEARCH-2   | [3]       |
| 8. Neff-PPAS    | [7]       |
| 9. pGenTHREADER | [10]      |
| 10. PRC         | [9]       |
| 11. PROSPECT2   | [6]       |
| 12. SPARKS-X    | [4]       |
| 13. SP3         | [5]       |
| 14. wdPPAS      | [7]       |

[1] Wu, S.; Zhang, Y. LOMETS: A local meta-threading-server for protein structure prediction. *Nucleic Acids Res.* **2007**, *35*, 3375–3382.

[2] Wu, S.; Zhang, Y. MUSTER: Improving protein sequence profile-profile alignments by using multiple sources of structure information. *Proteins* **2008**, *72*, 547–556.

[3] Soding, J. Protein homology detection by HMM-HMM comparison. *Bioinformatics* **2005**, *21*, 951–960.

[4] Zhou, H.; Zhou, Y. Single-body residue-level knowledge-based energy score combined with sequence-profile and secondary structure information for fold recognition. *Proteins*, **2004**, *55*, 1005–1013.

[5] Zhou, H.; Zhou, Y. Fold recognition by combining sequence profiles derived from evolution and from depth-dependent structural alignment of fragments. *Proteins*, **2005**, *58*, 321–328.

[6] Xu, Y.; Xu, D. Protein threading using PROSPECT: design and evaluation. *Proteins*, **2000**, *40*, 343–354.

[7] Yan, R.; Xu, D.; Yang, J.; Walker, S.; Zhang, Y. A comparative assessment and analysis of 20 representative sequence alignment methods for protein structure prediction. *Scientific Reports*, **2013**, *3*, 2619.

[8] Jaroszewski, L.; Rychlewski, L.; Li, Z.; Li, W.; Godzik, A. FFAS03: a server for profile-profile sequence alignments. *Nucleic Acids Res.* **2005**, *33*(Web Server issue): W284–288.

[9] Madera, M. Profile Comparer: a program for scoring and aligning profile hidden Markov models. *Bioinformatics*. **2008**, *24*(22):2630–2631.

[10] Lobley, A.; Sadowski, M. I.; Jones, D. T. pGenTHREADER and pDomTHREADER: new methods for improved protein fold recognition and superfamily discrimination. *Bioinformatics*. **2009**, *25*(14):1761–1767.

[11] Xu, D.; Jaroszewski, L.; Li, Z.; Godzik, A. FFAS-3D: improving fold recognition by including optimized structural features and template re-ranking. *Bioinformatics*. **2014**, *30*(5): 660–667.



### Supplementary comments on using PfamA\_28

There are several reasons why we used PfamA\_28. PfamA\_27 was released on March 2013 (based on Swiss 2012\_06 + SP-TrEMBL 2012\_06) and PfamA\_28 was released on May 2015 (based on Swiss 2014\_07 + SP-TrEMBL 2014\_07). They are both based on full UniProt sequences. The next release, PfamA\_29, is based on UniProtKB ‘reference proteomes’ (2015\_08). In *Papillomaviridae* the ‘reference proteomes’ in PfamA\_29 (15 species) do not have as good taxonomic coverage as ‘complete proteomes’ in PfamA\_28 (76 species). Starting from PfamA\_28 the seed sequences (that the HMM is based on) have started to move from UniProt sequences to UniProt ‘reference proteome’ sequences (A, B). If the reference proteomes cover most of the taxonomic diversity, then this change is very reasonable. Unfortunately, in some viral taxons the set of reference proteomes is far from real diversity. For example, in *Polyomaviridae* there is only one reference proteome in PfamA releases 29 to 31.

*Papillomaviridae* E1, *Polyomaviridae* Large-T and *Parvoviridae* NS1 most likely have a common ancestor. When the HMM model is built from a narrow set of sequences for one of them and as wide sequence set as possible for another, then the ‘wide model’ starts to recognise with high score the sequences that actually belongs to the other family. We see this phenomenon when searching relatives of E1 in full UniProt, where PF00519 recognises several polyomaviral and parvoviral sequences. In PfamA\_29 the PF00519 also starts to recognise more sequences in *Polyomaviridae* and *Parvoviridae* as well as cellular organisms. This is due to the improper set of seed sequences (due to a biased set of reference proteomes) or to other model assignment parameters. Running a random set of these non-*Papillomaviridae* viral sequences against current PfamA profiles using ‘hmmsearch’ in HMMER ([www.hmmmer.org](http://www.hmmmer.org)) gives the best hits on NS1 (PF01057) or Large-T (PF06431) respectively.

On the next PfamA release this problem will most likely be addressed (at least for *Papillomaviridae* and *Polyomaviridae*) as there will be a representative set of reference proteomes for both viral families (D).

### Footnotes on changes in Pfam A.

A) <ftp://ftp.ebi.ac.uk/pub/databases/Pfam/releases/Pfam28.0/relnotes.txt>

“As of release 28.0 we have begun to move our SEED alignments onto Reference Proteome sequences. In release 28.0 14190 families have SEEDs consisting of Reference Proteome sequences and 2040 have SEEDs consisting of non-Reference Proteome sequences.

We have now relaxed our policy on overlaps. From release 28.0 we now only check for overlaps within the Reference Proteome sequence set. We also now allow some overlaps at the ends of a match. We now allow overlaps which span less than 20% at either the N- or C-terminus of the lower scoring family where these overlaps occur in less than 1% of the family.”

**B)** <ftp://ftp.ebi.ac.uk/pub/databases/Pfam/releases/Pfam29.0/relnotes.txt>

“As of Pfam 29.0, the sequence database that Pfam is based upon changed to UniProtKB **reference proteomes** (prior to that it was based on all of UniProtKB). A separate table for UniProtKB statistics is provided below for releases 29.0 onwards).”

“As of release 28.0 we started to move our SEED alignments onto Reference Proteome sequences. In release 29.0 12969 families have SEEDs consisting solely of Reference Proteome sequences. The rest of the families contain some SEED sequence(s) that are in UniProtKB 2015\_08, but are not in UniProtKB reference proteomes 2015\_08.”

**C)** NAR 2016 database issue, <https://doi.org/10.1093/nar/gkv1344>

“We have applied two approaches to migrating *seed* alignments to the reference proteomes. The first method was to take the existing profile HMM and search against the reference proteome sequence database, align all significant matches (excluding partial matches) and make the resulting alignment 80% non-redundant. This alignment was used to construct a new profile HMM which was searched against UniProtKB. We compared the sensitivity of the new profile HMM with the results of running the original profile HMM against the same version of UniProtKB.”

**D)** Number of complete or reference proteomes of selected viral families in different database releases:

| Database and release                                | <i>Papilloma-viridae</i> | <i>Polyoma-viridae</i> | <i>Parvo-viridae</i> |
|-----------------------------------------------------|--------------------------|------------------------|----------------------|
| PfamA_28 (complete proteomes)                       | 76                       | 10                     | 23                   |
| PfamA_29 (reference proteomes)                      | 15                       | 1                      | 11                   |
| PfamA_30 (reference proteomes)                      | 37                       | 1                      | 11                   |
| PfamA_31 (reference proteomes)                      | 37                       | 1                      | 12                   |
| Current UniProt ‘reference proteomes’<br>(May 2017) | 166                      | 50                     | 15                   |
