# Supplementary material for: The Enigmatic Origin of Papillomavirus Protein Domains
Source: Viruses. 2017 Aug 23;9(9):240. doi: 10.3390/v9090240 (PMC5618006; doi:10.3390/v9090240)
Supplement: Supplementary file 1 [file viruses-09-00240-s001.zip › Supplementary_Material_File_S1.xlsx]

## Sheet: PfamA
the real positive hits shown in bold from Table 2
duplicates highlighted in yellow
PfamA_acc	pfamA_id	database	pfamseq_id	superkingdom	species	seq_start	seq_end	sequence length (aa)	lenght of coding contig (nt) (from Uniprot)	tBLASTn	HMMER 'hmmscan'	LOMETS test	Taxonomy ID	full taxonomy
PF00524	PPV_E1_N	PfamA_28 complete proteome	C4V8V5_NOSCE	E	Nosema ceranae (strain BRL01)	99	204	246	14397	-	E1_N	not applicable	578460	Eukaryota; Opisthokonta; Fungi; Microsporidia; Apansporoblastina; Nosematidae; Nosema; Nosema ceranae
PF00524	PPV_E1_N	PfamA_28 complete proteome	R0MJR2_NOSB1	E	Nosema bombycis (strain CQ1 / CVCC 102059)	84	181	215	139472	-	E1_N	not applicable	578461	Eukaryota; Opisthokonta; Fungi; Microsporidia; Apansporoblastina; Nosematidae; Nosema; Nosema bombycis
PF00524	PPV_E1_N	PfamA_28 full Uniprot	R0MJR2_NOSB1	E	Nosema bombycis (strain CQ1 / CVCC 102059) (Microsporidian parasite) (Pebrine of silkworm)	84	181	215	139472	-	E1_N	not applicable	578461	Eukaryota; Opisthokonta; Fungi; Microsporidia; Apansporoblastina; Nosematidae; Nosema; Nosema bombycis
PF00524	PPV_E1_N	PfamA_28 full Uniprot	C4V8V5_NOSCE	E	Nosema ceranae (strain BRL01) (Microsporidian parasite)	99	204	246	14397	-	E1_N	not applicable	578460	Eukaryota; Opisthokonta; Fungi; Microsporidia; Apansporoblastina; Nosematidae; Nosema; Nosema ceranae
PF00524	PPV_E1_N	PfamA_28 full Uniprot	T0L8A9_9MICR	E	Nosema apis BRL 01	150	241	310	25509	-	E1_N	not applicable	1037528	Eukaryota; Opisthokonta; Fungi; Microsporidia; Apansporoblastina; Nosematidae; Nosema; Nosema apis
PF00524	PPV_E1_N	PfamA_28 full Uniprot	V7BKU5_PHAVU	E	Phaseolus vulgaris (Kidney bean) (French bean)	163	266	302	31977256	-	E1_N	not applicable	3885	Eukaryota; Viridiplantae; Streptophyta; Streptophytina; Embryophyta; Tracheophyta; Euphyllophyta; Spermatophyta; Magnoliophyta; Mesangiospermae; eudicotyledons; Gunneridae; Pentapetalae; rosids; fabids; Fabales; Fabaceae; Papilionoideae; Phaseoleae; Phaseolus
PF00520	PPV_E1_C	PfamA_28 complete proteome	E0SH87_DICD3	B	Dickeya dadantii (strain 3937)	267	473	589	4922802		PPV_E1_C	2gxa, 1tue, 2v9p	198628	Bacteria; Proteobacteria; Gammaproteobacteria; Enterobacteriales; Enterobacteriaceae; Dickeya.
PF00519	PPV_E1_C	PfamA_28 full Uniprot	E0SH87_DICD3	B	Dickeya dadantii (strain 3937) (Erwinia chrysanthemi (strain 3937))	267	473	589	4922802		PPV_E1_C	2gxa, 1tue, 2v9p	198628	Bacteria; Proteobacteria; Gammaproteobacteria; Enterobacteriales; Enterobacteriaceae; Dickeya.
PF00519	PPV_E1_C	PfamA_28 full Uniprot	B1BDK8_CLOBO	B	Clostridium botulinum C str. Eklund	372	600	731	32708		PPV_E1_C	1tue, 2v9p	445337	Bacteria; Firmicutes; Clostridia; Clostridiales; Clostridiaceae; Clostridium.
PF00519	PPV_E1_C	PfamA_28 full Uniprot	Y1IGU1_ENTCL	B	Enterobacter cloacae BIDMC 8	286	474	583			PPV_E1_C	2gxa, 1tue, 2v9p	1329846	Bacteria; Proteobacteria; Gammaproteobacteria; Enterobacteriales; Enterobacteriaceae; Enterobacter; Enterobacter cloacae complex.
PF00519	PPV_E1_C	PfamA_28 full Uniprot	T7M9E5_ECOLX	B	Escherichia coli HVH 175 (4-3405184)	286	474	583			PPV_E1_C		1281104	Bacteria; Proteobacteria; Gammaproteobacteria; Enterobacteriales; Enterobacteriaceae; Escherichia.
PF00519	PPV_E1_C	PfamA_28 full Uniprot	T7P0P0_ECOLX	B	Escherichia coli HVH 184 (4-3343286)	286	474	583			PPV_E1_C		1281111	Bacteria; Proteobacteria; Gammaproteobacteria; Enterobacteriales; Enterobacteriaceae; Escherichia.
PF00519	PPV_E1_C	PfamA_28 full Uniprot	Y1DMU7_ENTCL	B	Enterobacter cloacae UCI 30	286	474	589			PPV_E1_C		1400149	Bacteria; Proteobacteria; Gammaproteobacteria; Enterobacteriales; Enterobacteriaceae; Enterobacter; Enterobacter cloacae complex.
PF00519	PPV_E1_C	PfamA_28 full Uniprot	H5HUI8_ECOLX	B	Escherichia coli DEC11D	289	474	589			PPV_E1_C		868189	Bacteria; Proteobacteria; Gammaproteobacteria; Enterobacteriales; Enterobacteriaceae; Escherichia.
PF00519	PPV_E1_C	PfamA_28 full Uniprot	H5I9E9_ECOLX	B	Escherichia coli DEC11E	289	474	589			PPV_E1_C		868190	Bacteria; Proteobacteria; Gammaproteobacteria; Enterobacteriales; Enterobacteriaceae; Escherichia.
PF00519	PPV_E1_C	PfamA_28 full Uniprot	S2F2Y9_KLEPN	B	Klebsiella pneumoniae UHKPC57	250	442	589			PPV_E1_C	2gxa, 1tue, 2v9p	1284817	Bacteria; Proteobacteria; Gammaproteobacteria; Enterobacteriales; Enterobacteriaceae; Klebsiella.
PF00519	PPV_E1_C	PfamA_28 full Uniprot	A0A031W0F2_KLEPN	B	Klebsiella pneumoniae MGH 75	250	442	589					1438798	Bacteria; Proteobacteria; Gammaproteobacteria; Enterobacteriales; Enterobacteriaceae; Klebsiella.
PF00519	PPV_E1_C	PfamA_28 full Uniprot	U6TA05_KLEPN	B	Klebsiella pneumoniae 303K	250	442	589			PPV_E1_C	2gxa, 1tue, 2v9p	1381121	Bacteria; Proteobacteria; Gammaproteobacteria; Enterobacteriales; Enterobacteriaceae; Klebsiella.
PF00519	PPV_E1_C	PfamA_28 full Uniprot	S7G0N2_KLEPN	B	Klebsiella pneumoniae UHKPC179	250	442	589			PPV_E1_C	2gxa, 1tue, 2v9p	1284818	Bacteria; Proteobacteria; Gammaproteobacteria; Enterobacteriales; Enterobacteriaceae; Klebsiella.
PF00519	PPV_E1_C	PfamA_28 full Uniprot	V2Z1D5_KLEPN	B	Klebsiella pneumoniae BIDMC 40	250	442	589			PPV_E1_C	2gxa, 1tue, 2v9p	1328426	Bacteria; Proteobacteria; Gammaproteobacteria; Enterobacteriales; Enterobacteriaceae; Klebsiella.
PF00519	PPV_E1_C	PfamA_28 full Uniprot	A0A031SBK8_KLEPN	B	Klebsiella pneumoniae MGH 63	250	442	589					1438786	Bacteria; Proteobacteria; Gammaproteobacteria; Enterobacteriales; Enterobacteriaceae; Klebsiella.
PF00519	PPV_E1_C	PfamA_28 full Uniprot	K1NJR2_KLEPN	B	Klebsiella pneumoniae subsp. pneumoniae WGLW1	279	469	599			PPV_E1_C	2gxa, 1tue, 2v9p	1203544	Bacteria; Proteobacteria; Gammaproteobacteria; Enterobacteriales; Enterobacteriaceae; Klebsiella.
PF00519	PPV_E1_C	PfamA_28 full Uniprot	K1P0E7_KLEPN	B	Klebsiella pneumoniae subsp. pneumoniae WGLW3	279	469	599			PPV_E1_C	2gxa, 1tue, 2v9p	1203546	Bacteria; Proteobacteria; Gammaproteobacteria; Enterobacteriales; Enterobacteriaceae; Klebsiella.
PF00519	PPV_E1_C	PfamA_28 full Uniprot	K2YI49_ECOLX	B	Escherichia coli FRIK920	134	306	437			PPV_E1_C	2gxa, 1tue, 2v9p	1005483	Bacteria; Proteobacteria; Gammaproteobacteria; Enterobacteriales; Enterobacteriaceae; Escherichia.
PF00519	PPV_E1_C	PfamA_28 full Uniprot	A0A026J6E3_ECOLX	B	Escherichia coli O177:NM str. 2010C-4558	70	208	356			PPV_E1_C	2gxa, 1tue, 2v9p	1446706	Bacteria; Proteobacteria; Gammaproteobacteria; Enterobacteriales; Enterobacteriaceae; Escherichia.
PF00519	PPV_E1_C	PfamA_28 full Uniprot	J8Q246_9ENTR	B	Pectobacterium wasabiae CFBP 3304	263	441	590			PPV_E1_C	2gxa, 1tue, 2v9p	1175631	Bacteria; Proteobacteria; Gammaproteobacteria; Enterobacteriales; Enterobacteriaceae; Pectobacterium.
PF00519	PPV_E1_C	PfamA_28 full Uniprot	L0VW00_SERPL	B	Serratia plymuthica A30	206	359	488			PPV_E1_C	2gxa, 1tue, 2v9p	1206776	Bacteria; Proteobacteria; Gammaproteobacteria; Enterobacteriales; Enterobacteriaceae; Serratia.
PF00519	PPV_E1_C	HMMER	A0A177Q2P3_9PLAN	B	Planctomycetaceae bacterium SCGC AG-212-D15	242	428	601	52041		PPV_E1_C	2gxa, 1tue, 2v9p	1799653	Bacteria; PVC group; Planctomycetes; Planctomycetia; Planctomycetales; Planctomycetaceae; unclassified Planctomycetaceae
PF00519	PPV_E1_C	PfamA_28 full Uniprot	Q91S73_9VIRU	V	Planaria asexual strain-specific virus-like element type 1	18	208	227	1911		PPV_E1_C	2gxa, 1tue, 2v9p	159252	Viruses; unclassified viruses.
PF00519	PPV_E1_C	HMMER	Q91S73_9VIRU	V	Planaria asexual strain-specific virus-like element type 1	18	208	227	1911		PPV_E1_C	2gxa, 1tue, 2v9p	159252	Viruses; unclassified viruses.

## Sheet: SUPERFAMILY 55464 E1 DBD
the real positive hits shown in bold in Table 3
in BOLD 55464_52540 combinations
SF	SF name	database	SUPERFAMILY model	model name	SCOP domain origin (source of seed sequence)	sequence ID	identical sequnces	superkingdom	species	comment	seq_start	seq_end	sequence length (aa)	SUPERFAMILY e-value	Scaffold Length (nt)	Taxonomy ID	full taxonomy
55464	Origin of replication-binding domain, RBD-like	SUPERFAMILY genomes	0040363	DNA-binding domain of REP protein	Geminiviridae	jgi|Serla_S7_9|437869|Genemark.6304_g	F8NVU6	E	Serpula lacrymans var. lacrymans S7.9		95	203	447	2.2e-17	2744376	578457	Eukaryota; Opisthokonta; Fungi; Dikarya; Basidiomycota; Agaricomycotina; Agaricomycetes; Agaricomycetidae; Boletales; Coniophorineae; Serpulaceae; Serpula; Serpula lacrymans; Serpula lacrymans var. lacrymans
55464	Origin of replication-binding domain, RBD-like	SUPERFAMILY genomes	0040363	DNA-binding domain of REP protein	Geminiviridae	jgi|Serla_S7_9|441268|Genemark.9703_g	F8P612	E	Serpula lacrymans var. lacrymans S7.9		95	203	468	1.56e-18	1564726	578457	Eukaryota; Opisthokonta; Fungi; Dikarya; Basidiomycota; Agaricomycotina; Agaricomycetes; Agaricomycetidae; Boletales; Coniophorineae; Serpulaceae; Serpula; Serpula lacrymans; Serpula lacrymans var. lacrymans
55464	Origin of replication-binding domain, RBD-like	SUPERFAMILY genomes	0040363	DNA-binding domain of REP protein	Geminiviridae	jgi|Pisti1|85229|gw1.347.5.1	A0A0C3MVJ8	E	Pisolithus tinctorius Marx 270 v1.0		30	115	334	0.000000000000522	6568	37468	Eukaryota; Opisthokonta; Fungi; Dikarya; Basidiomycota; Agaricomycotina; Agaricomycetes; Agaricomycetidae; Boletales; Sclerodermatineae; Pisolithaceae; Pisolithus
55464	Origin of replication-binding domain, RBD-like	SUPERFAMILY genomes	0040363	DNA-binding domain of REP protein	Geminiviridae	jgi|Lacbi1|333195|fgenesh3_pg.C_scaffold_48000050	B0DV72	E	Laccaria bicolor S238N-H82		79	165	382	0.00000000915	422888	486041	Eukaryota; Opisthokonta; Fungi; Dikarya; Basidiomycota; Agaricomycotina; Agaricomycetes; Agaricomycetidae; Agaricales; Tricholomataceae; Laccaria; Laccaria bicolor
55464	Origin of replication-binding domain, RBD-like	SUPERFAMILY genomes	0040363	DNA-binding domain of REP protein	Geminiviridae	jgi|Aspbr1|333610|CE121495_150	A0A1L9U7M9	E	Aspergillus brasiliensis v1.0		32	98	179	0.0000302	740883	319629	Eukaryota; Opisthokonta; Fungi; Dikarya; Ascomycota; saccharomyceta; Pezizomycotina; leotiomyceta; Eurotiomycetes; Eurotiomycetidae; Eurotiales; Aspergillaceae; Aspergillus
55464	Origin of replication-binding domain, RBD-like	SUPERFAMILY genomes	0040363	DNA-binding domain of REP protein	Geminiviridae	GSTUMT00012322001		E	Tuber melanosporum Vittad		61	169	404	0.00000000119		39416	Eukaryota; Opisthokonta; Fungi; Dikarya; Ascomycota; saccharomyceta; Pezizomycotina; Pezizomycetes; Pezizales; Tuberaceae; Tuber
55464	Origin of replication-binding domain, RBD-like	SUPERFAMILY genomes	0040363	DNA-binding domain of REP protein	Geminiviridae	jCVI|EIN_003840	L7FKJ3	E	Entamoeba invadens 1.2		37	146	427	1.37e-24	45729	33085	Eukaryota; Amoebozoa; Archamoebae; Entamoebidae; Entamoeba
55464	Origin of replication-binding domain, RBD-like	SUPERFAMILY genomes	0040363	DNA-binding domain of REP protein	Geminiviridae	jCVI|EIN_003860	L7FMK9	E	Entamoeba invadens 1.2		28	131	456	1.65e-25	45729	33085	Eukaryota; Amoebozoa; Archamoebae; Entamoebidae; Entamoeba
55464	Origin of replication-binding domain, RBD-like	SUPERFAMILY genomes	0040363	DNA-binding domain of REP protein	Geminiviridae	jCVI|EIN_003880	L7FL16	E	Entamoeba invadens 1.2		39	134	139	5.49e-20	45729	33085	Eukaryota; Amoebozoa; Archamoebae; Entamoebidae; Entamoeba
55464	Origin of replication-binding domain, RBD-like	SUPERFAMILY genomes	0040363	DNA-binding domain of REP protein	Geminiviridae	MDP0000142927|PACid:22654733		E	Malus domestica v196		219	272	316	0.00000000513		3750	Eukaryota; Viridiplantae; Streptophyta; Streptophytina; Embryophyta; Tracheophyta; Euphyllophyta; Spermatophyta; Magnoliophyta; Mesangiospermae; eudicotyledons; Gunneridae; Pentapetalae; rosids; fabids; Rosales; Rosaceae; Maloideae; Maleae; Malus
55464	Origin of replication-binding domain, RBD-like	SUPERFAMILY genomes	0040363	DNA-binding domain of REP protein	Geminiviridae	MDP0000310578|PACid:22624687		E	Malus domestica v196		10	122	332	4.85e-35		3750	Eukaryota; Viridiplantae; Streptophyta; Streptophytina; Embryophyta; Tracheophyta; Euphyllophyta; Spermatophyta; Magnoliophyta; Mesangiospermae; eudicotyledons; Gunneridae; Pentapetalae; rosids; fabids; Rosales; Rosaceae; Maloideae; Maleae; Malus
55464	Origin of replication-binding domain, RBD-like	SUPERFAMILY genomes	0040363	DNA-binding domain of REP protein	Geminiviridae	gi|294877756|ref|XP_002768111.1|	C5LQU4	E	Perkinsus marinus		412	463	839	0.0000156	625208	423536	Eukaryota; Alveolata; Perkinsea; Perkinsida; Perkinsidae; Perkinsus; Perkinsus marinus; Perkinsus marinus ATCC 50983;
55464	Origin of replication-binding domain, RBD-like	SUPERFAMILY genomes	0040363	DNA-binding domain of REP protein	Geminiviridae	gi|294875282|ref|XP_002767252.1|	C5LTH8	E	Perkinsus marinus		299	350	687	0.0000119	85072	423536	Eukaryota; Alveolata; Perkinsea; Perkinsida; Perkinsidae; Perkinsus; Perkinsus marinus; Perkinsus marinus ATCC 50983;
55464	Origin of replication-binding domain, RBD-like	SUPERFAMILY Uniprot	0040363	DNA-binding domain of REP protein	Geminiviridae	C5IS70		E	Pyropia tenera	plasmid pPT4-NU	7	114	134	1.3e-28	1820	2785	Eukaryota; Rhodophyta; Bangiophyceae; Bangiales; Bangiaceae; Pyropia; Pyropia tenera;
55464	Origin of replication-binding domain, RBD-like	SUPERFAMILY Uniprot	0040363	DNA-binding domain of REP protein	Geminiviridae	Q8W249		E	Pyropia tenera	plasmid pPT4	7	114	134	3.4e-28	1808	2785	Eukaryota; Rhodophyta; Bangiophyceae; Bangiales; Bangiaceae; Pyropia; Pyropia tenera;
55464	Origin of replication-binding domain, RBD-like	SUPERFAMILY Uniprot	0040363	DNA-binding domain of REP protein	Geminiviridae	Q9M7P8		E	Porphyra pulchra	plasmid	9	111	378	9.1e-27	2101	60925	Eukaryota; Rhodophyta; Bangiophyceae; Bangiales; Bangiaceae; Porphyra; Porphyra pulchra;
55464	Origin of replication-binding domain, RBD-like	SUPERFAMILY Uniprot	0040363	DNA-binding domain of REP protein	Geminiviridae	Q9M7P9		E	Porphyra pulchra	plasmid	8	113	378	1.3e-29	1899	60925	Eukaryota; Rhodophyta; Bangiophyceae; Bangiales; Bangiaceae; Porphyra; Porphyra pulchra;
55464	Origin of replication-binding domain, RBD-like	SUPERFAMILY Uniprot	0040363	DNA-binding domain of REP protein	Geminiviridae	Q9M7Q0		E	Porphyra pulchra	plasmid	9	113	378	2.8e-29	2105	60925	Eukaryota; Rhodophyta; Bangiophyceae; Bangiales; Bangiaceae; Porphyra; Porphyra pulchra;
55464	Origin of replication-binding domain, RBD-like	SUPERFAMILY Uniprot	0040363	DNA-binding domain of REP protein	Geminiviridae	Afum_A1163:AFUB_033000.t1	B0XVM8	E	Aspergillus fumigatus A1163		64	133	396	0.000000101	4759548	451804	Eukaryota; Opisthokonta; Fungi; Dikarya; Ascomycota; saccharomyceta; Pezizomycotina; leotiomyceta; Eurotiomycetes; Eurotiomycetidae; Eurotiales; Aspergillaceae; Aspergillus; Aspergillus fumigatus
55464	Origin of replication-binding domain, RBD-like (E1 DBD)	HMMER UniProt	0040363	DNA-binding domain of REP protein	Geminiviridae	A0A0G2R249_DIOAL		E	Dioscorea alata		5	122	372	2.3e-48	1149	55571	Eukaryota; Viridiplantae; Streptophyta; Streptophytina; Embryophyta; Tracheophyta; Euphyllophyta; Spermatophyta; Magnoliophyta; Mesangiospermae; Liliopsida; Petrosaviidae; Dioscoreales; Dioscoreaceae; Dioscorea
55464	Origin of replication-binding domain, RBD-like (E1 DBD)	HMMER UniProt	0040363	DNA-binding domain of REP protein	Geminiviridae	A0A0G2R1U4_DIOAL		E	Dioscorea alata		5	122	372	2.4e-48	1149	55571	Eukaryota; Viridiplantae; Streptophyta; Streptophytina; Embryophyta; Tracheophyta; Euphyllophyta; Spermatophyta; Magnoliophyta; Mesangiospermae; Liliopsida; Petrosaviidae; Dioscoreales; Dioscoreaceae; Dioscorea
55464	Origin of replication-binding domain, RBD-like (E1 DBD)	HMMER UniProt	0040363	DNA-binding domain of REP protein	Geminiviridae	A0A0G2R256_DIOAL		E	Dioscorea alata		5	122	372	2.3e-46	1196	55571	Eukaryota; Viridiplantae; Streptophyta; Streptophytina; Embryophyta; Tracheophyta; Euphyllophyta; Spermatophyta; Magnoliophyta; Mesangiospermae; Liliopsida; Petrosaviidae; Dioscoreales; Dioscoreaceae; Dioscorea
55464	Origin of replication-binding domain, RBD-like (E1 DBD)	HMMER UniProt	0040363	DNA-binding domain of REP protein	Geminiviridae	A0A0G2R1X9_DIOAL		E	Dioscorea alata		5	122	200	3.5e-49	3086	55571	Eukaryota; Viridiplantae; Streptophyta; Streptophytina; Embryophyta; Tracheophyta; Euphyllophyta; Spermatophyta; Magnoliophyta; Mesangiospermae; Liliopsida; Petrosaviidae; Dioscoreales; Dioscoreaceae; Dioscorea
55464	Origin of replication-binding domain, RBD-like (E1 DBD)	HMMER UniProt	0040363	DNA-binding domain of REP protein	Geminiviridae	A0A0G2R278_DIOAL		E	Dioscorea alata		5	122	200	7.9e-49	3086	55571	Eukaryota; Viridiplantae; Streptophyta; Streptophytina; Embryophyta; Tracheophyta; Euphyllophyta; Spermatophyta; Magnoliophyta; Mesangiospermae; Liliopsida; Petrosaviidae; Dioscoreales; Dioscoreaceae; Dioscorea
55464	Origin of replication-binding domain, RBD-like (E1 DBD)	HMMER UniProt	0040363	DNA-binding domain of REP protein	Geminiviridae	A0A0G2R1Y3_DIOAL		E	Dioscorea alata		5	122	200	8.3e-49	3086	55571	Eukaryota; Viridiplantae; Streptophyta; Streptophytina; Embryophyta; Tracheophyta; Euphyllophyta; Spermatophyta; Magnoliophyta; Mesangiospermae; Liliopsida; Petrosaviidae; Dioscoreales; Dioscoreaceae; Dioscorea
55464	Origin of replication-binding domain, RBD-like (E1 DBD)	HMMER UniProt	0040363	DNA-binding domain of REP protein	Geminiviridae	A0A0G2R221_DIOAL		E	Dioscorea alata		5	122	200	9.5e-49	3086	55571	Eukaryota; Viridiplantae; Streptophyta; Streptophytina; Embryophyta; Tracheophyta; Euphyllophyta; Spermatophyta; Magnoliophyta; Mesangiospermae; Liliopsida; Petrosaviidae; Dioscoreales; Dioscoreaceae; Dioscorea
55464	Origin of replication-binding domain, RBD-like (E1 DBD)	HMMER UniProt	0040363	DNA-binding domain of REP protein	Geminiviridae	A0A0G2R1Y4_DIOAL		E	Dioscorea alata		5	122	200	2.1e-48	3086	55571	Eukaryota; Viridiplantae; Streptophyta; Streptophytina; Embryophyta; Tracheophyta; Euphyllophyta; Spermatophyta; Magnoliophyta; Mesangiospermae; Liliopsida; Petrosaviidae; Dioscoreales; Dioscoreaceae; Dioscorea
55464	Origin of replication-binding domain, RBD-like (E1 DBD)	HMMER UniProt	0040363	DNA-binding domain of REP protein	Geminiviridae	A0A0G2R1W0_9LILI		E	Dioscorea brevipetiolata		6	122	371	3.4e-46	1196	304170	Eukaryota; Viridiplantae; Streptophyta; Streptophytina; Embryophyta; Tracheophyta; Euphyllophyta; Spermatophyta; Magnoliophyta; Mesangiospermae; Liliopsida; Petrosaviidae; Dioscoreales; Dioscoreaceae; Dioscorea
55464	Origin of replication-binding domain, RBD-like (E1 DBD)	HMMER UniProt	0040363	DNA-binding domain of REP protein	Geminiviridae	A0A0G2R1Z8_9LILI		E	Dioscorea calcicola		6	121	371	6.8e-46	1196	327918	Eukaryota; Viridiplantae; Streptophyta; Streptophytina; Embryophyta; Tracheophyta; Euphyllophyta; Spermatophyta; Magnoliophyta; Mesangiospermae; Liliopsida; Petrosaviidae; Dioscoreales; Dioscoreaceae; Dioscorea
55464	Origin of replication-binding domain, RBD-like (E1 DBD)	HMMER UniProt	0040363	DNA-binding domain of REP protein	Geminiviridae	A0A0G2R1V5_9LILI		E	Dioscorea decipiens		6	121	371	2.0e-45	1196	167583	Eukaryota; Viridiplantae; Streptophyta; Streptophytina; Embryophyta; Tracheophyta; Euphyllophyta; Spermatophyta; Magnoliophyta; Mesangiospermae; Liliopsida; Petrosaviidae; Dioscoreales; Dioscoreaceae; Dioscorea
55464	Origin of replication-binding domain, RBD-like (E1 DBD)	HMMER UniProt	0040363	DNA-binding domain of REP protein	Geminiviridae	A0A0G2R259_9LILI		E	Dioscorea glabra		6	122	371	3.2e-45	1196	167585	Eukaryota; Viridiplantae; Streptophyta; Streptophytina; Embryophyta; Tracheophyta; Euphyllophyta; Spermatophyta; Magnoliophyta; Mesangiospermae; Liliopsida; Petrosaviidae; Dioscoreales; Dioscoreaceae; Dioscorea
55464	Origin of replication-binding domain, RBD-like (E1 DBD)	HMMER UniProt	0040363	DNA-binding domain of REP protein	Geminiviridae	A0A0G2R1V3_9LILI		E	Dioscorea nummularia		6	122	370	3.4e-43	1194	1238140	Eukaryota; Viridiplantae; Streptophyta; Streptophytina; Embryophyta; Tracheophyta; Euphyllophyta; Spermatophyta; Magnoliophyta; Mesangiospermae; Liliopsida; Petrosaviidae; Dioscoreales; Dioscoreaceae; Dioscorea
55464	Origin of replication-binding domain, RBD-like (E1 DBD)	HMMER UniProt	0040363	DNA-binding domain of REP protein	Geminiviridae	A0A0G2R1V0_9LILI		E	Dioscorea nummularia		6	122	370	7.4e-42	1194	1238140	Eukaryota; Viridiplantae; Streptophyta; Streptophytina; Embryophyta; Tracheophyta; Euphyllophyta; Spermatophyta; Magnoliophyta; Mesangiospermae; Liliopsida; Petrosaviidae; Dioscoreales; Dioscoreaceae; Dioscorea
55464	Origin of replication-binding domain, RBD-like (E1 DBD)	HMMER UniProt	0040363	DNA-binding domain of REP protein	Geminiviridae	A0A0G2R253_9LILI		E	Dioscorea nummularia		6	122	371	2.0e-44	1196	1238140	Eukaryota; Viridiplantae; Streptophyta; Streptophytina; Embryophyta; Tracheophyta; Euphyllophyta; Spermatophyta; Magnoliophyta; Mesangiospermae; Liliopsida; Petrosaviidae; Dioscoreales; Dioscoreaceae; Dioscorea
55464	Origin of replication-binding domain, RBD-like (E1 DBD)	HMMER UniProt	0040363	DNA-binding domain of REP protein	Geminiviridae	A0A0G2R2B3_9LILI		E	Dioscorea oppositifolia		6	122	371	1.2e-41	1196	569628	Eukaryota; Viridiplantae; Streptophyta; Streptophytina; Embryophyta; Tracheophyta; Euphyllophyta; Spermatophyta; Magnoliophyta; Mesangiospermae; Liliopsida; Petrosaviidae; Dioscoreales; Dioscoreaceae; Dioscorea
55464	Origin of replication-binding domain, RBD-like (E1 DBD)	HMMER UniProt	0040363	DNA-binding domain of REP protein	Geminiviridae	A0A0G2R1U7_9LILI		E	Dioscorea persimilis		5	122	372	4.4e-48	1149	374970	Eukaryota; Viridiplantae; Streptophyta; Streptophytina; Embryophyta; Tracheophyta; Euphyllophyta; Spermatophyta; Magnoliophyta; Mesangiospermae; Liliopsida; Petrosaviidae; Dioscoreales; Dioscoreaceae; Dioscorea
55464	Origin of replication-binding domain, RBD-like (E1 DBD)	HMMER UniProt	0040363	DNA-binding domain of REP protein	Geminiviridae	A0A0G2R1Z4_9LILI		E	Dioscorea persimilis		5	122	372	6.0e-47	1149	374970	Eukaryota; Viridiplantae; Streptophyta; Streptophytina; Embryophyta; Tracheophyta; Euphyllophyta; Spermatophyta; Magnoliophyta; Mesangiospermae; Liliopsida; Petrosaviidae; Dioscoreales; Dioscoreaceae; Dioscorea
55464	Origin of replication-binding domain, RBD-like (E1 DBD)	HMMER UniProt	0040363	DNA-binding domain of REP protein	Geminiviridae	A0A0G2R1Z3_9LILI		E	Dioscorea persimilis		5	122	372	6.1e-47	1149	374970	Eukaryota; Viridiplantae; Streptophyta; Streptophytina; Embryophyta; Tracheophyta; Euphyllophyta; Spermatophyta; Magnoliophyta; Mesangiospermae; Liliopsida; Petrosaviidae; Dioscoreales; Dioscoreaceae; Dioscorea
55464	Origin of replication-binding domain, RBD-like (E1 DBD)	HMMER UniProt	0040363	DNA-binding domain of REP protein	Geminiviridae	A0A0G2R1Z6_9LILI		E	Dioscorea persimilis		6	121	370	1.5e-46	1193	374970	Eukaryota; Viridiplantae; Streptophyta; Streptophytina; Embryophyta; Tracheophyta; Euphyllophyta; Spermatophyta; Magnoliophyta; Mesangiospermae; Liliopsida; Petrosaviidae; Dioscoreales; Dioscoreaceae; Dioscorea
55464	Origin of replication-binding domain, RBD-like (E1 DBD)	HMMER UniProt	0040363	DNA-binding domain of REP protein	Geminiviridae	A0A0G2R231_9LILI		E	Dioscorea persimilis		6	121	370	2.3e-46	1193	374970	Eukaryota; Viridiplantae; Streptophyta; Streptophytina; Embryophyta; Tracheophyta; Euphyllophyta; Spermatophyta; Magnoliophyta; Mesangiospermae; Liliopsida; Petrosaviidae; Dioscoreales; Dioscoreaceae; Dioscorea
55464	Origin of replication-binding domain, RBD-like (E1 DBD)	HMMER UniProt	0040363	DNA-binding domain of REP protein	Geminiviridae	A0A0G2R2B0_9LILI		E	Dioscorea transversa		5	122	372	4.3e-47	1149	1518336	Eukaryota; Viridiplantae; Streptophyta; Streptophytina; Embryophyta; Tracheophyta; Euphyllophyta; Spermatophyta; Magnoliophyta; Mesangiospermae; Liliopsida; Petrosaviidae; Dioscoreales; Dioscoreaceae; Dioscorea
55464	Origin of replication-binding domain, RBD-like (E1 DBD)	HMMER UniProt	0040363	DNA-binding domain of REP protein	Geminiviridae	A0A0G2R1V7_9LILI		E	Dioscorea transversa		6	121	371	4.5e-45	1196	1518336	Eukaryota; Viridiplantae; Streptophyta; Streptophytina; Embryophyta; Tracheophyta; Euphyllophyta; Spermatophyta; Magnoliophyta; Mesangiospermae; Liliopsida; Petrosaviidae; Dioscoreales; Dioscoreaceae; Dioscorea
55464	Origin of replication-binding domain, RBD-like (E1 DBD)	HMMER UniProt	0040363	DNA-binding domain of REP protein	Geminiviridae	A0A0G2R2B4_9LILI		E	Dioscorea wallichii		6	121	370	1.2e-43	1193	325983	Eukaryota; Viridiplantae; Streptophyta; Streptophytina; Embryophyta; Tracheophyta; Euphyllophyta; Spermatophyta; Magnoliophyta; Mesangiospermae; Liliopsida; Petrosaviidae; Dioscoreales; Dioscoreaceae; Dioscorea
55464	Origin of replication-binding domain, RBD-like (E1 DBD)	HMMER Ensemble Genomes	0040363	DNA-binding domain of REP protein	Geminiviridae	KN545227.1_FG001		E	Oryza longistaminata		1	114	204	8.4e-14	2140	4528	Eukaryota; Viridiplantae; Streptophyta; Streptophytina; Embryophyta; Tracheophyta; Euphyllophyta; Spermatophyta; Magnoliophyta; Mesangiospermae; Liliopsida; Petrosaviidae; commelinids; Poales; Poaceae; BOP clade; Oryzoideae; Oryzeae; Oryzinae; Oryza
55464	Origin of replication-binding domain, RBD-like (E1 DBD)	SUPERFAMILY Uniprot	0040363	DNA-binding domain of REP protein	Geminiviridae	G9CPP6_PHYNI		E	Phytophthora nicotianae	mitochondrial	9	115	183	4.2e-06	788	4790	Eukaryota; Stramenopiles; Oomycetes; Peronosporales; Phytophthora
55464	Origin of replication-binding domain, RBD-like (E1 DBD)	SUPERFAMILY Uniprot	0040363	DNA-binding domain of REP protein	Geminiviridae	G9CPQ4_PHYNI		E	Phytophthora nicotianae	mitochondrial	9	115	183	3.8e-06	881	4790	Eukaryota; Stramenopiles; Oomycetes; Peronosporales; Phytophthora
55464	Origin of replication-binding domain, RBD-like (E1 DBD)	SUPERFAMILY Uniprot	0040363	DNA-binding domain of REP protein	Geminiviridae	G9CPM5_PHYNI		E	Phytophthora nicotianae	mitochondrial	9	115	183	8.9e-06	890	4790	Eukaryota; Stramenopiles; Oomycetes; Peronosporales; Phytophthora
55464	Origin of replication-binding domain, RBD-like (E1 DBD)	SUPERFAMILY Uniprot	0040363	DNA-binding domain of REP protein	Geminiviridae	G9CPP5_PHYNI		E	Phytophthora nicotianae	mitochondrial	9	115	183	1.0e-05	890	4790	Eukaryota; Stramenopiles; Oomycetes; Peronosporales; Phytophthora
55464	Origin of replication-binding domain, RBD-like (E1 DBD)	SUPERFAMILY Uniprot	0040363	DNA-binding domain of REP protein	Geminiviridae	G9CPK8_PHYNI		E	Phytophthora nicotianae	mitochondrial	9	116	183	4.0e-06	893	4790	Eukaryota; Stramenopiles; Oomycetes; Peronosporales; Phytophthora
55464	Origin of replication-binding domain, RBD-like (E1 DBD)	SUPERFAMILY Uniprot	0040363	DNA-binding domain of REP protein	Geminiviridae	G9CPN8_PHYNI		E	Phytophthora nicotianae	mitochondrial	9	115	183	8.8e-06	894	4790	Eukaryota; Stramenopiles; Oomycetes; Peronosporales; Phytophthora
55464	Origin of replication-binding domain, RBD-like (E1 DBD)	SUPERFAMILY UniProt	0041922	Relaxase domain		RFI_01839	X6PC32	E	Reticulomyxa filosa		2	89	429	2.6e-05	1995	46433	Eukaryota; Rhizaria; Foraminifera; Monothalamids; Reticulomyxidae; Reticulomyxa
55464	Origin of replication-binding domain, RBD-like (E1 DBD)	SUPERFAMILY UniProt	0040363	DNA-binding domain of REP protein	Geminiviridae	X6MQ48_RETFI		E	Reticulomyxa filosa		200	297	516	2.7e-20	2232	46433	Eukaryota; Rhizaria; Foraminifera; Monothalamids; Reticulomyxidae; Reticulomyxa
55464	Origin of replication-binding domain, RBD-like (E1 DBD)	SUPERFAMILY Uniprot	0040363	DNA-binding domain of REP protein	Geminiviridae	U9TRZ4_RHIID		E	Rhizophagus irregularis (strain DAOM 181602 / DAOM 197198 / MUCL 43194)		23	128	333	1.2e-19	4702	747089	Eukaryota; Opisthokonta; Fungi; Mucoromycota; Glomeromycotina; Glomeromycetes; Glomerales; Glomeraceae; Rhizophagus; Rhizophagus irregularis
55464	Origin of replication-binding domain, RBD-like (E1 DBD)	HMMER UniProt	0040363	DNA-binding domain of REP protein	Geminiviridae	A0A068VFQ8_COFCA		E	Coffea canephora		6	122	341	7.1e-42	103070	49390	Eukaryota; Viridiplantae; Streptophyta; Streptophytina; Embryophyta; Tracheophyta; Euphyllophyta; Spermatophyta; Magnoliophyta; Mesangiospermae; eudicotyledons; Gunneridae; Pentapetalae; asterids; lamiids; Gentianales; Rubiaceae; Ixoroideae; Gardenieae complex; Bertiereae - Coffeeae clade; Coffeeae; Coffea
55464	Origin of replication-binding domain, RBD-like (E1 DBD)	HMMER UniProt	0040363	DNA-binding domain of REP protein	Geminiviridae	A0A068VDX0_COFCA		E	Coffea canephora		6	121	236	6.9e-39	330882	49390	Eukaryota; Viridiplantae; Streptophyta; Streptophytina; Embryophyta; Tracheophyta; Euphyllophyta; Spermatophyta; Magnoliophyta; Mesangiospermae; eudicotyledons; Gunneridae; Pentapetalae; asterids; lamiids; Gentianales; Rubiaceae; Ixoroideae; Gardenieae complex; Bertiereae - Coffeeae clade; Coffeeae; Coffea
55464	Origin of replication-binding domain, RBD-like (E1 DBD)	HMMER UniProt	0040363	DNA-binding domain of REP protein	Geminiviridae	A0A068VDM6_COFCA		E	Coffea canephora		6	113	113	4.7e-34	371338	49390	Eukaryota; Viridiplantae; Streptophyta; Streptophytina; Embryophyta; Tracheophyta; Euphyllophyta; Spermatophyta; Magnoliophyta; Mesangiospermae; eudicotyledons; Gunneridae; Pentapetalae; asterids; lamiids; Gentianales; Rubiaceae; Ixoroideae; Gardenieae complex; Bertiereae - Coffeeae clade; Coffeeae; Coffea
55464	Origin of replication-binding domain, RBD-like (E1 DBD)	HMMER UniProt	0040363	DNA-binding domain of REP protein	Geminiviridae	A0A068VB00_COFCA		E	Coffea canephora		5	120	384	7.7e-39	605405	49390	Eukaryota; Viridiplantae; Streptophyta; Streptophytina; Embryophyta; Tracheophyta; Euphyllophyta; Spermatophyta; Magnoliophyta; Mesangiospermae; eudicotyledons; Gunneridae; Pentapetalae; asterids; lamiids; Gentianales; Rubiaceae; Ixoroideae; Gardenieae complex; Bertiereae - Coffeeae clade; Coffeeae; Coffea
55464	Origin of replication-binding domain, RBD-like (E1 DBD)	HMMER UniProt	0040363	DNA-binding domain of REP protein	Geminiviridae	A0A068V7E4_COFCA		E	Coffea canephora		5	119	318	2.2e-38	1072483	49390	Eukaryota; Viridiplantae; Streptophyta; Streptophytina; Embryophyta; Tracheophyta; Euphyllophyta; Spermatophyta; Magnoliophyta; Mesangiospermae; eudicotyledons; Gunneridae; Pentapetalae; asterids; lamiids; Gentianales; Rubiaceae; Ixoroideae; Gardenieae complex; Bertiereae - Coffeeae clade; Coffeeae; Coffea
55464	Origin of replication-binding domain, RBD-like (E1 DBD)	HMMER UniProt	0040363	DNA-binding domain of REP protein	Geminiviridae	A0A068V624_COFCA		E	Coffea canephora		6	121	360	1.8e-39	1146896	49390	Eukaryota; Viridiplantae; Streptophyta; Streptophytina; Embryophyta; Tracheophyta; Euphyllophyta; Spermatophyta; Magnoliophyta; Mesangiospermae; eudicotyledons; Gunneridae; Pentapetalae; asterids; lamiids; Gentianales; Rubiaceae; Ixoroideae; Gardenieae complex; Bertiereae - Coffeeae clade; Coffeeae; Coffea
55464	Origin of replication-binding domain, RBD-like (E1 DBD)	HMMER UniProt	0040363	DNA-binding domain of REP protein	Geminiviridae	A0A068UW36_COFCA		E	Coffea canephora		6	122	272	1.9e-42	1901649	49390	Eukaryota; Viridiplantae; Streptophyta; Streptophytina; Embryophyta; Tracheophyta; Euphyllophyta; Spermatophyta; Magnoliophyta; Mesangiospermae; eudicotyledons; Gunneridae; Pentapetalae; asterids; lamiids; Gentianales; Rubiaceae; Ixoroideae; Gardenieae complex; Bertiereae - Coffeeae clade; Coffeeae; Coffea
55464	Origin of replication-binding domain, RBD-like (E1 DBD)	HMMER UniProt	0040363	DNA-binding domain of REP protein	Geminiviridae	A0A0D1YMS2_9EURO		E	Exophiala spinifera		44	150	202	3.1e-10	3791951	91928	Eukaryota; Opisthokonta; Fungi; Dikarya; Ascomycota; saccharomyceta; Pezizomycotina; leotiomyceta; Eurotiomycetes; Chaetothyriomycetidae; Chaetothyriales; Herpotrichiellaceae; Exophiala
55464	Origin of replication-binding domain, RBD-like (E1 DBD)	HMMER UniProt	0040363	DNA-binding domain of REP protein	Geminiviridae	A0A0F7ZIQ0_9HYPO		E	Hirsutella minnesotensis 3608		34	113	384	3.2e-06	22849	1043627	Eukaryota; Opisthokonta; Fungi; Dikarya; Ascomycota; saccharomyceta; Pezizomycotina; leotiomyceta; sordariomyceta; Sordariomycetes; Hypocreomycetidae; Hypocreales; Ophiocordycipitaceae; Hirsutella; Hirsutella minnesotensis
55464	Origin of replication-binding domain, RBD-like (E1 DBD)	HMMER UniProt	0040363	DNA-binding domain of REP protein	Geminiviridae	A0A0C9YD25_9AGAR		E	Laccaria amethystina LaAM-08-1		69	177	399	2.3e-06	340656	1095629	Eukaryota; Opisthokonta; Fungi; Dikarya; Basidiomycota; Agaricomycotina; Agaricomycetes; Agaricomycetidae; Agaricales; Tricholomataceae; Laccaria; Laccaria amethystina
55464	Origin of replication-binding domain, RBD-like (E1 DBD)	HMMER UniProt	0040363	DNA-binding domain of REP protein	Geminiviridae	A0A0B4GTG8_9HYPO		E	Metarhizium majus ARSEF 297		37	115	391	6.1e-06	11634	1276143	Eukaryota; Opisthokonta; Fungi; Dikarya; Ascomycota; saccharomyceta; Pezizomycotina; leotiomyceta; sordariomyceta; Sordariomycetes; Hypocreomycetidae; Hypocreales; Clavicipitaceae; Metarhizium; Metarhizium majus
55464	Origin of replication-binding domain, RBD-like (E1 DBD)	SUPERFAMILY Uniprot	0040363	DNA-binding domain of REP protein	Geminiviridae	A4ZH94_PHYSO		E	Phytophthora sojae	mitochondrial	9	93	98	3.3e-10	42977	67593	Eukaryota; Stramenopiles; Oomycetes; Peronosporales; Phytophthora
55464	Origin of replication-binding domain, RBD-like (E1 DBD)	SUPERFAMILY UniProt	0040363	DNA-binding domain of REP protein	Geminiviridae	F8Q706_SERL3		E	Serpula lacrymans var. lacrymans (strain S7.3)		95	203	512	5.1e-15	1539471	936435	Eukaryota; Opisthokonta; Fungi; Dikarya; Basidiomycota; Agaricomycotina; Agaricomycetes; Agaricomycetidae; Boletales; Coniophorineae; Serpulaceae; Serpula; Serpula lacrymans; Serpula lacrymans var. lacrymans
55464	Origin of replication-binding domain, RBD-like (E1 DBD)	SUPERFAMILY UniProt	0040363	DNA-binding domain of REP protein	Geminiviridae	F8PXP0_SERL3		E	Serpula lacrymans var. lacrymans (strain S7.3)		54	162	406	4.3e-14	2701176	936435	Eukaryota; Opisthokonta; Fungi; Dikarya; Basidiomycota; Agaricomycotina; Agaricomycetes; Agaricomycetidae; Boletales; Coniophorineae; Serpulaceae; Serpula; Serpula lacrymans; Serpula lacrymans var. lacrymans
55464	Origin of replication-binding domain, RBD-like (E1 DBD)	SUPERFAMILY 'vl'	0042148	relaxase domain		gi|589892239|ref|YP_009008603.1	V5UQN3_9CAUD	V	Mycobacterium phage Adler		12	286	1006	1.2e-36		1327959	dsDNA viruses, no RNA stage; Caudovirales; Siphoviridae; unclassified Siphoviridae; Mycobacterium phage Adler;	_gap_,55464,_gap_,52540,52540,_gap_
55464	Origin of replication-binding domain, RBD-like (E1 DBD)	SUPERFAMILY 'vl'	0040790	Replication protein Rep, nuclease domain	Parvoviridae	gi|9628396|ref|NP_042987.1	Q00683	V	Human herpesvirus 6A		15	206	490	8.1e-51		32603	dsDNA viruses, no RNA stage; Herpesvirales; Herpesviridae; Betaherpesvirinae; Roseolovirus; Human herpesvirus 6A;	55464,52540
55464	Origin of replication-binding domain, RBD-like (E1 DBD)	SUPERFAMILY 'vl'	0040790	Replication protein Rep, nuclease domain	Parvoviridae	gi|9633159|ref|NP_050269.1	Q9WSZ6	V	Human herpesvirus 6B		15	206	490	6.8e-52		32604	dsDNA viruses, no RNA stage; Herpesvirales; Herpesviridae; Betaherpesvirinae; Roseolovirus; Human herpesvirus 6B;	55464,52540
55464	Origin of replication-binding domain, RBD-like (E1 DBD)	SUPERFAMILY 'vl'	0040363	DNA-binding domain of REP protein	Geminiviridae	gi|313501309|ref|YP_004046687.1	E5AZV9	V	Ageratum leaf curl Cameroon alphasatellite		5	69	115	7.2e-27		743035	Satellites; Satellite Nucleic Acids; Single stranded DNA satellites; Alphasatellites; Begomovirus-associated alphasatellites; unclassified Begomovirus-associated alphasatellites; Ageratum leaf curl Cameroon alphasatellite;	55464
55464	Origin of replication-binding domain, RBD-like (E1 DBD)	SUPERFAMILY 'vl'	0040363	DNA-binding domain of REP protein	Geminiviridae	gi|607069321|ref|YP_009021877.1	W8SWD2	V	Porcine stool-associated circular virus 5		156	293	350	0.000000000391		1475063	ssDNA viruses; Circoviridae; unclassified Circoviridae; Porcine stool-associated circular virus 5;	55464,52540
55464	Origin of replication-binding domain, RBD-like (E1 DBD)	SUPERFAMILY 'vl'	0040363	DNA-binding domain of REP protein	Geminiviridae	gi|601447807|ref|YP_009021043.1	I0AY93	V	Cassava associated cicular DNA virus		3	101	329	0.0000000000000449		1170653	ssDNA viruses; unclassified ssDNA viruses; Cassava associated cicular DNA virus;	55464,_gap_
55464	Origin of replication-binding domain, RBD-like (E1 DBD)	SUPERFAMILY 'vl'	0040363	DNA-binding domain of REP protein	Geminiviridae	gi|582973390|ref|YP_009001753.1	W5U1T1	V	Dragonfly larvae associated circular virus-9		43	121	312	0.0000696		1454030	ssDNA viruses; unclassified ssDNA viruses; Dragonfly larvae associated circular virus-9;	55464,_gap_
55464	Origin of replication-binding domain, RBD-like (E1 DBD)	SUPERFAMILY 'vl'	0040363	DNA-binding domain of REP protein	Geminiviridae	gi|607840605|ref|YP_009021862.1	K0A109	V	Dragonfly-associated circular virus 1		2	98	249	6.5e-16		1234887	ssDNA viruses; unclassified ssDNA viruses; Dragonfly-associated circular virus 1;	55464,_gap_
55464	Origin of replication-binding domain, RBD-like (E1 DBD)	SUPERFAMILY 'vl'	0040363	DNA-binding domain of REP protein	Geminiviridae	gi|607840607|ref|YP_009021860.1	K0A1L7	V	Dragonfly-associated circular virus 1		2	98	318	0.0000000000000011		1234887	ssDNA viruses; unclassified ssDNA viruses; Dragonfly-associated circular virus 1;	55464,_gap_
55464	Origin of replication-binding domain, RBD-like (E1 DBD)	SUPERFAMILY 'vl'	0040363	DNA-binding domain of REP protein	Geminiviridae	gi|608055539|ref|YP_009021858.1	K0A1L6	V	Dragonfly-associated circular virus 2		3	102	201	3.7e-16		1234886	ssDNA viruses; unclassified ssDNA viruses; Dragonfly-associated circular virus 2;	55464
55464	Origin of replication-binding domain, RBD-like (E1 DBD)	SUPERFAMILY 'vl'	0040363	DNA-binding domain of REP protein	Geminiviridae	gi|608055540|ref|YP_009021856.1	K0A2R4	V	Dragonfly-associated circular virus 2		3	102	319	0.00000000000000101		1234886	ssDNA viruses; unclassified ssDNA viruses; Dragonfly-associated circular virus 2;	55464,52540
55464	Origin of replication-binding domain, RBD-like (E1 DBD)	SUPERFAMILY 'vl'	0040363	DNA-binding domain of REP protein	Geminiviridae	gi|608055524|ref|YP_009021854.1	K0A2R0	V	Dragonfly-associated circular virus 3		2	101	256	8.2e-17		1234884	ssDNA viruses; unclassified ssDNA viruses; Dragonfly-associated circular virus 3;	55464,_gap_
55464	Origin of replication-binding domain, RBD-like (E1 DBD)	SUPERFAMILY 'vl'	0040363	DNA-binding domain of REP protein	Geminiviridae	gi|608055525|ref|YP_009021852.1	K0A2I7	V	Dragonfly-associated circular virus 3		2	101	323	1.4e-16		1234884	ssDNA viruses; unclassified ssDNA viruses; Dragonfly-associated circular virus 3;	55464,52540
55464	Origin of replication-binding domain, RBD-like (E1 DBD)	SUPERFAMILY 'vl'	0040363	DNA-binding domain of REP protein	Geminiviridae	gi|672550935|ref|YP_009051832.1	A0A077XLY1	V	HCBI8.215 virus		3	102	196	0.00000000000000156		1516079	ssDNA viruses; unclassified ssDNA viruses; HCBI8.215 virus;	55464
55464	Origin of replication-binding domain, RBD-like (E1 DBD)	SUPERFAMILY 'vl'	0040363	DNA-binding domain of REP protein	Geminiviridae	gi|672550939|ref|YP_009051835.1	A0A077XLW1	V	HCBI9.212 virus		39	146	244	0.00000000000000119		1516080	ssDNA viruses; unclassified ssDNA viruses; HCBI9.212 virus;	55464
55464	Origin of replication-binding domain, RBD-like (E1 DBD)	SUPERFAMILY 'vl'	0040363	DNA-binding domain of REP protein	Geminiviridae	gi|672550943|ref|YP_009051838.1	A0A077XL96	V	MSSI2.225 virus		3	102	232	4.0e-17		1516081	ssDNA viruses; unclassified ssDNA viruses; MSSI2.225 virus;	55464,_gap_
55464	Origin of replication-binding domain, RBD-like (E1 DBD)	SUPERFAMILY 'vl'	0040363	DNA-binding domain of REP protein	Geminiviridae	gi|603013907|ref|YP_009021041.1	J7LJF3	V	Nepavirus		2	104	281	4.2e-21		1224510	ssDNA viruses; unclassified ssDNA viruses; Nepavirus;	55464,_gap_
55464	Origin of replication-binding domain, RBD-like (E1 DBD)	SUPERFAMILY 'vl'	0040363	DNA-binding domain of REP protein	Geminiviridae	gi|256352172|ref|YP_003104796.1	C7FFR1	V	Sclerotinia sclerotiorum hypovirulence associated DNA virus 1		2	101	324	0.00000000000000384		664785	ssDNA viruses; unclassified ssDNA viruses; Sclerotinia sclerotiorum hypovirulence associated DNA virus 1;	55464,52540

## Sheet: SUPERFAMILY 55464 52540
the real positive hits shown in bold in Table 3
SF	SF name	database	SUPERFAMILY model	model name	SCOP domain origin (source of seed sequence)	sequence ID	identical sequnces	superkingdom	species	comment	seq_start	seq_end	sequence length (aa)	SUPERFAMILY e-value	Scaffold Length (nt)	Taxonomy ID	full taxonomy	domain combination
55464	Origin of replication-binding domain, RBD-like	SUPERFAMILY genomes	0040363	DNA-binding domain of REP protein	Geminiviridae	jgi|Serla_S7_9|437869|Genemark.6304_g	F8NVU6	E	Serpula lacrymans var. lacrymans S7.9		95	203	447	2.2e-17	2744376	578457	Eukaryota; Opisthokonta; Fungi; Dikarya; Basidiomycota; Agaricomycotina; Agaricomycetes; Agaricomycetidae; Boletales; Coniophorineae; Serpulaceae; Serpula; Serpula lacrymans; Serpula lacrymans var. lacrymans
55464	Origin of replication-binding domain, RBD-like	SUPERFAMILY genomes	0040363	DNA-binding domain of REP protein	Geminiviridae	jgi|Serla_S7_9|441268|Genemark.9703_g	F8P612	E	Serpula lacrymans var. lacrymans S7.9		95	203	468	1.56e-18	1564726	578457	Eukaryota; Opisthokonta; Fungi; Dikarya; Basidiomycota; Agaricomycotina; Agaricomycetes; Agaricomycetidae; Boletales; Coniophorineae; Serpulaceae; Serpula; Serpula lacrymans; Serpula lacrymans var. lacrymans
55464	Origin of replication-binding domain, RBD-like	SUPERFAMILY genomes	0040363	DNA-binding domain of REP protein	Geminiviridae	jgi|Pisti1|85229|gw1.347.5.1	A0A0C3MVJ8	E	Pisolithus tinctorius Marx 270 v1.0		30	115	334	0.000000000000522	6568	37468	Eukaryota; Opisthokonta; Fungi; Dikarya; Basidiomycota; Agaricomycotina; Agaricomycetes; Agaricomycetidae; Boletales; Sclerodermatineae; Pisolithaceae; Pisolithus
55464	Origin of replication-binding domain, RBD-like	SUPERFAMILY genomes	0040363	DNA-binding domain of REP protein	Geminiviridae	jgi|Lacbi1|333195|fgenesh3_pg.C_scaffold_48000050	B0DV72	E	Laccaria bicolor S238N-H82		79	165	382	0.00000000915	422888	486041	Eukaryota; Opisthokonta; Fungi; Dikarya; Basidiomycota; Agaricomycotina; Agaricomycetes; Agaricomycetidae; Agaricales; Tricholomataceae; Laccaria; Laccaria bicolor
55464	Origin of replication-binding domain, RBD-like	SUPERFAMILY genomes	0040363	DNA-binding domain of REP protein	Geminiviridae	jCVI|EIN_003840	L7FKJ3	E	Entamoeba invadens 1.2		37	146	427	1.37e-24	45729	33085	Eukaryota; Amoebozoa; Archamoebae; Entamoebidae; Entamoeba
55464	Origin of replication-binding domain, RBD-like	SUPERFAMILY genomes	0040363	DNA-binding domain of REP protein	Geminiviridae	gi|294877756|ref|XP_002768111.1|	C5LQU4	E	Perkinsus marinus		412	463	839	0.0000156	625208	423536	Eukaryota; Alveolata; Perkinsea; Perkinsida; Perkinsidae; Perkinsus; Perkinsus marinus; Perkinsus marinus ATCC 50983;
55464	Origin of replication-binding domain, RBD-like	SUPERFAMILY genomes	0040363	DNA-binding domain of REP protein	Geminiviridae	gi|294875282|ref|XP_002767252.1|	C5LTH8	E	Perkinsus marinus		299	350	687	0.0000119	85072	423536	Eukaryota; Alveolata; Perkinsea; Perkinsida; Perkinsidae; Perkinsus; Perkinsus marinus; Perkinsus marinus ATCC 50983;
55464	Origin of replication-binding domain, RBD-like	SUPERFAMILY Uniprot	0040363	DNA-binding domain of REP protein	Geminiviridae	Q9M7P8		E	Porphyra pulchra	plasmid	9	111	378	9.1e-27	2101	60925	Eukaryota; Rhodophyta; Bangiophyceae; Bangiales; Bangiaceae; Porphyra; Porphyra pulchra;
55464	Origin of replication-binding domain, RBD-like	SUPERFAMILY Uniprot	0040363	DNA-binding domain of REP protein	Geminiviridae	Q9M7P9		E	Porphyra pulchra	plasmid	8	113	378	1.3e-29	1899	60925	Eukaryota; Rhodophyta; Bangiophyceae; Bangiales; Bangiaceae; Porphyra; Porphyra pulchra;
55464	Origin of replication-binding domain, RBD-like	SUPERFAMILY Uniprot	0040363	DNA-binding domain of REP protein	Geminiviridae	Q9M7Q0		E	Porphyra pulchra	plasmid	9	113	378	2.8e-29	2105	60925	Eukaryota; Rhodophyta; Bangiophyceae; Bangiales; Bangiaceae; Porphyra; Porphyra pulchra;
55464	Origin of replication-binding domain, RBD-like (E1 DBD)	Ensemble Genomes	0040363	DNA-binding domain of REP protein	Geminiviridae	KN545227.1_FG001		E	Oryza longistaminata		1	114	204	8.4e-14	2140	4528	Eukaryota; Viridiplantae; Streptophyta; Streptophytina; Embryophyta; Tracheophyta; Euphyllophyta; Spermatophyta; Magnoliophyta; Mesangiospermae; Liliopsida; Petrosaviidae; commelinids; Poales; Poaceae; BOP clade; Oryzoideae; Oryzeae; Oryzinae; Oryza
55464	Origin of replication-binding domain, RBD-like (E1 DBD)	SUPERFAMILY UniProt	0040363	DNA-binding domain of REP protein	Geminiviridae	X6MQ48_RETFI		E	Reticulomyxa filosa		200	297	516	2.7e-20	2232	46433	Eukaryota; Rhizaria; Foraminifera; Monothalamids; Reticulomyxidae; Reticulomyxa
55464	Origin of replication-binding domain, RBD-like (E1 DBD)	HMMER UniProt	0040363	DNA-binding domain of REP protein	Geminiviridae	A0A068VFQ8_COFCA		E	Coffea canephora		6	122	341	7.1e-42	103070	49390	Eukaryota; Viridiplantae; Streptophyta; Streptophytina; Embryophyta; Tracheophyta; Euphyllophyta; Spermatophyta; Magnoliophyta; Mesangiospermae; eudicotyledons; Gunneridae; Pentapetalae; asterids; lamiids; Gentianales; Rubiaceae; Ixoroideae; Gardenieae complex; Bertiereae - Coffeeae clade; Coffeeae; Coffea
55464	Origin of replication-binding domain, RBD-like (E1 DBD)	SUPERFAMILY UniProt	0040363	DNA-binding domain of REP protein	Geminiviridae	F8Q706_SERL3		E	Serpula lacrymans var. lacrymans (strain S7.3)		95	203	512	5.1e-15	1539471	936435	Eukaryota; Opisthokonta; Fungi; Dikarya; Basidiomycota; Agaricomycotina; Agaricomycetes; Agaricomycetidae; Boletales; Coniophorineae; Serpulaceae; Serpula; Serpula lacrymans; Serpula lacrymans var. lacrymans
55464	Origin of replication-binding domain, RBD-like (E1 DBD)	SUPERFAMILY UniProt	0040363	DNA-binding domain of REP protein	Geminiviridae	F8PXP0_SERL3		E	Serpula lacrymans var. lacrymans (strain S7.3)		54	162	406	4.3e-14	2701176	936435	Eukaryota; Opisthokonta; Fungi; Dikarya; Basidiomycota; Agaricomycotina; Agaricomycetes; Agaricomycetidae; Boletales; Coniophorineae; Serpulaceae; Serpula; Serpula lacrymans; Serpula lacrymans var. lacrymans
55464	Origin of replication-binding domain, RBD-like (E1 DBD)	SUPERFAMILY 'vl'	0042148	relaxase domain		gi|589892239|ref|YP_009008603.1	V5UQN3_9CAUD	V	Mycobacterium phage Adler		12	286	1006	1.2e-36		1327959	dsDNA viruses, no RNA stage; Caudovirales; Siphoviridae; unclassified Siphoviridae; Mycobacterium phage Adler;	_gap_,55464,_gap_,52540,52540,_gap_
55464	Origin of replication-binding domain, RBD-like (E1 DBD)	SUPERFAMILY 'vl'	0040790	Replication protein Rep, nuclease domain	Parvoviridae	gi|9628396|ref|NP_042987.1	Q00683	V	Human herpesvirus 6A		15	206	490	8.1e-51		32603	dsDNA viruses, no RNA stage; Herpesvirales; Herpesviridae; Betaherpesvirinae; Roseolovirus; Human herpesvirus 6A;	55464,52540
55464	Origin of replication-binding domain, RBD-like (E1 DBD)	SUPERFAMILY 'vl'	0040790	Replication protein Rep, nuclease domain	Parvoviridae	gi|9633159|ref|NP_050269.1	Q9WSZ6	V	Human herpesvirus 6B		15	206	490	6.8e-52		32604	dsDNA viruses, no RNA stage; Herpesvirales; Herpesviridae; Betaherpesvirinae; Roseolovirus; Human herpesvirus 6B;	55464,52540
55464	Origin of replication-binding domain, RBD-like (E1 DBD)	SUPERFAMILY 'vl'	0040363	DNA-binding domain of REP protein	Geminiviridae	gi|607069321|ref|YP_009021877.1	W8SWD2	V	Porcine stool-associated circular virus 5		156	293	350	0.000000000391		1475063	ssDNA viruses; Circoviridae; unclassified Circoviridae; Porcine stool-associated circular virus 5;	55464,52540
55464	Origin of replication-binding domain, RBD-like (E1 DBD)	SUPERFAMILY 'vl'	0040363	DNA-binding domain of REP protein	Geminiviridae	gi|608055540|ref|YP_009021856.1	K0A2R4	V	Dragonfly-associated circular virus 2		3	102	319	0.00000000000000101		1234886	ssDNA viruses; unclassified ssDNA viruses; Dragonfly-associated circular virus 2;	55464,52540
55464	Origin of replication-binding domain, RBD-like (E1 DBD)	SUPERFAMILY 'vl'	0040363	DNA-binding domain of REP protein	Geminiviridae	gi|608055525|ref|YP_009021852.1	K0A2I7	V	Dragonfly-associated circular virus 3		2	101	323	1.4e-16		1234884	ssDNA viruses; unclassified ssDNA viruses; Dragonfly-associated circular virus 3;	55464,52540
55464	Origin of replication-binding domain, RBD-like (E1 DBD)	SUPERFAMILY 'vl'	0040363	DNA-binding domain of REP protein	Geminiviridae	gi|256352172|ref|YP_003104796.1	C7FFR1	V	Sclerotinia sclerotiorum hypovirulence associated DNA virus 1		2	101	324	0.00000000000000384		664785	ssDNA viruses; unclassified ssDNA viruses; Sclerotinia sclerotiorum hypovirulence associated DNA virus 1;	55464,52540

## Sheet: SUPERFAMILY 54957 E2 DBD
the real positive hits shown in bold in Table 3					for SF_54957
SF	SF name	database	SUPERFAMILY model	model name	SCOP domain origin (source of seed sequence)	sequence ID	sequence name	identical sequnces	superkingdom	species	seq_start	seq_end	sequence length (aa)	SUPERFAMILY e-value	Taxonomy ID	full taxonomy
54957	Viral DNA-binding domain	SUPERFAMILY vl	0035341	Viral DNA-binding domain	gammaherpesvirinae	gi|24943130|ref|NP_733892.1	ORF39	Q993H1	V	Callitrichine herpesvirus 3	150	302	327	8.63e-65	106331	dsDNA viruses, no RNA stage; Herpesvirales; Herpesviridae; Gammaherpesvirinae; Lymphocryptovirus; Callitrichine herpesvirus 3;
54957	Viral DNA-binding domain	SUPERFAMILY vl	0035341	Viral DNA-binding domain	gammaherpesvirinae	gi|82503233|ref|YP_401677.1	EBNA-1	P03211	V	Human herpesvirus 4	461	607	641	5.65e-74	10376	dsDNA viruses, no RNA stage; Herpesvirales; Herpesviridae; Gammaherpesvirinae; Lymphocryptovirus; Human herpesvirus 4;
54957	Viral DNA-binding domain	SUPERFAMILY vl	0035341	Viral DNA-binding domain	gammaherpesvirinae	gi|139424506|ref|YP_001129471.1	EBNA-1	Q1HVF7	V	Human herpesvirus 4 type 2	461	607	641	1.26e-70	12509	dsDNA viruses, no RNA stage; Herpesvirales; Herpesviridae; Gammaherpesvirinae; Lymphocryptovirus; Human herpesvirus 4; Human herpesvirus 4 type 2;
54957	Viral DNA-binding domain	SUPERFAMILY vl	0035341	Viral DNA-binding domain	gammaherpesvirinae	gi|51518045|ref|YP_067973.1	EBNA-1	O91332	V	Macacine herpesvirus 4	320	466	511	1.41e-74	45455	dsDNA viruses, no RNA stage; Herpesvirales; Herpesviridae; Gammaherpesvirinae; Lymphocryptovirus; Macacine herpesvirus 4;
54957	Viral DNA-binding domain	HMMER Uniprot	0035341	Viral DNA-binding domain	gammaherpesvirinae	A0A0S0DXP1_9GAMA	EBNA-1		V	Lymphocryptovirus Macaca/pfe-lcl-E3	328	474	519	1.2e-70	1716044	dsDNA viruses, no RNA stage; Herpesvirales; Herpesviridae; Gammaherpesvirinae; Lymphocryptovirus; unclassified Lymphocryptovirus
54957	Viral DNA-binding domain	HMMER Uniprot	0035341	Viral DNA-binding domain	gammaherpesvirinae	Q80890_CHV12	EBNA-1		V	Cercopithecine herpesvirus 12 ((CeHV-12) (Baboon herpesvirus))	295	440	476	4.0e-76	106332	dsDNA viruses, no RNA stage › Herpesvirales › Herpesviridae › Gammaherpesvirinae › Lymphocryptovirus

## Sheet: SUPERFAMILY 161229 E6
the real positive hits shown in bold in Table 3					for SF_161229
SF	SF name	database	SUPERFAMILY model	model name	SCOP domain origin (source of seed sequence)	sequence ID	superkingdom	species	seq_start	seq_end	sequence length (aa)	SUPERFAMILY e-value	Scaffold Length (nt)	LOMETS test	Taxonomy ID	full taxonomy
161229	E6 C-terminal domain-like	SUPERFAMILY Uniprot	0053919	E6 C-terminal domain-like	Papillomaviridae	F7T9H3	B	Achromobacter xylosoxidans AXX-A (Achromobacter insuavis AXX-A)	6	45	58	0.0000929	112724	High hit to E6 3py7 but also to 2FDN which is a 2[4FE-4S] FERREDOXIN FROM CLOSTRIDIUM ACIDI-URICI	1003200	Bacteria; Proteobacteria; Betaproteobacteria; Burkholderiales; Alcaligenaceae; Achromobacter; Achromobacter xylosoxidans; Achromobacter xylosoxidans AXX-A;
